# Supplementary material
Source: publisher site journal article supplement (https://www.dovepress.com/article/403401)

Table 2 ROC Analysis for Cytokines in Discriminating Patients with TB from CPA-TB Cases

| Cytokine                | Cutoff Point (pg/mL) | Sensitivity (%) | Specificity (%) | 95% Confidence interval | Youden' index |
|-------------------------|----------------------|-----------------|-----------------|-------------------------|---------------|
| IL-1 $\beta$            | >5.7                 | 72.50           | 78.12           | 0.663 to 0.866          | 0.5063        |
| IFN- $\gamma$           | $\leq$ 6.3           | 33.33           | 92.00           | 0.387 to 0.663          | 0.2533        |
| IL-5                    | $\leq$ 4             | 50.00           | 77.27           | 0.485 to 0.755          | 0.2727        |
| IL-12P70                | >7.2                 | 65.22           | 72.73           | 0.521 to 0.846          | 0.3794        |
| IL-8                    | >49.9                | 83.78           | 94.29           | 0.870 to 0.987          | 0.7807        |
| IL-4                    | $\leq$ 6.1           | 67.65           | 45.83           | 0.400 to 0.668          | 0.1348        |
| IL-6                    | >8.9                 | 82.05           | 55.88           | 0.611 to 0.826          | 0.3793        |
| IL-10                   | >4                   | 77.78           | 40.74           | 0.376 to 0.655          | 0.1852        |
| IFN- $\alpha$           | $\leq$ 19.3          | 90.91           | 33.33           | 0.380 to 0.715          | 0.2424        |
| TNF- $\alpha$           | >9.8                 | 52.78           | 95.83           | 0.561 to 0.806          | 0.4861        |
| IL-1 $\beta$ +IL-8      | —                    | 83.78           | 93.75           | 0.860 to 0.985          | 0.7753        |
| IL-6+IL-8               | —                    | 80.56           | 97.06           | 0.880 to 0.991          | 0.7761        |
| IL-1 $\beta$ +IL-8+IL-6 | —                    | 94.44           | 80.65           | 0.871 to 0.989          | 0.7509        |

ROC, Receiver Operating Characteristic; TB, tuberculosis infection; CPA-TB, tuberculosis infection and GM positive

Table 3 ROC Analysis for Cytokines in Discriminating Patients with TB from CPA+ Cases

| Cytokine                         | Cutoff Point (pg/mL) | Sensitivity (%) | Specificity (%) | 95%Confidence interval | Youden' index |
|----------------------------------|----------------------|-----------------|-----------------|------------------------|---------------|
| IL-1 $\beta$                     | >5.7                 | 79.55           | 78.12           | 0.713 to 0.897         | 0.5767        |
| IFN- $\gamma$                    | $\leq$ 6.6           | 32.26           | 92.00           | 0.418 to 0.690         | 0.2426        |
| IL-5                             | $\leq$ 5.9           | 83.33           | 54.55           | 0.531 to 0.786         | 0.3788        |
| IL-12P70                         | >19.2                | 42.86           | 100.00          | 0.593 to 0.879         | 0.4286        |
| IL-8                             | >65.9                | 85.00           | 97.14           | 0.893 to 0.993         | 0.8214        |
| IL-4                             | $\leq$ 10.9          | 85.37           | 37.50           | 0.435 to 0.686         | 0.2287        |
| IL-6                             | >12                  | 75.56           | 67.65           | 0.681 to 0.872         | 0.432         |
| IL-10                            | >3.2                 | 97.30           | 29.63           | 0.471 to 0.722         | 0.2693        |
| IFN- $\alpha$                    | $\leq$ 19.1          | 88.00           | 33.33           | 0.372 to 0.695         | 0.2133        |
| TNF- $\alpha$                    | >10.8                | 63.41           | 100.00          | 0.683 to 0.889         | 0.6341        |
| IL-1 $\beta$ +IL-8               | —                    | 89.47           | 96.87           | 0.904 to 0.997         | 0.8635        |
| TNF- $\alpha$ +IL-8              | —                    | 97.14           | 100.00          | 0.932 to 1.000         | 0.9714        |
| IL-1 $\beta$ +IL-8+TNF- $\alpha$ | —                    | 97.14           | 100.00          | 0.931 to 1.000         | 0.9714        |

ROC, Receiver Operating Characteristic; TB, tuberculosis infection; CPA+, GM positive and Tumors/Pneumonia

Table 4 ROC Analysis for Cytokines in Discriminating Patients with TB from CPA-TB + CPA Cases

| Cytokine                                | Cutoff Point (pg/mL) | Sensitivity (%) | Specificity (%) | 95%Confidence interval | Youden' index |
|-----------------------------------------|----------------------|-----------------|-----------------|------------------------|---------------|
| IL-1 $\beta$                            | >5.7                 | 76.19           | 78.12           | 0.714 to 0.867         | 0.5432        |
| IFN- $\gamma$                           | $\leq$ 6.6           | 32.79           | 92.00           | 0.431 to 0.650         | 0.2479        |
| IL-5                                    | $\leq$ 5.9           | 77.94           | 54.55           | 0.541 to 0.746         | 0.3249        |
| IL-12P70                                | >7.2                 | 66.67           | 72.73           | 0.604 to 0.836         | 0.3939        |
| IL-8                                    | >49.9                | 85.71           | 94.29           | 0.901 to 0.986         | 0.8000        |
| IL-4                                    | $\leq$ 9             | 76.00           | 41.67           | 0.448 to 0.651         | 0.1767        |
| IL-6                                    | >8.9                 | 83.33           | 55.88           | 0.673 to 0.834         | 0.3922        |
| IL-10                                   | >4                   | 81.25           | 40.74           | 0.457 to 0.669         | 0.2199        |
| IFN- $\alpha$                           | $\leq$ 19.3          | 89.36           | 33.33           | 0.412 to 0.670         | 0.2270        |
| TNF- $\alpha$                           | >10.8                | 55.84           | 100.00          | 0.654 to 0.831         | 0.5584        |
| IL-1 $\beta$ +IL-8                      | —                    | 88.00           | 93.75           | 0.902 to 0.988         | 0.8175        |
| IL-6+IL-8                               | —                    | 89.33           | 91.18           | 0.909 to 0.990         | 0.8051        |
| TNF- $\alpha$ +IL-8                     | —                    | 92.65           | 95.83           | 0.926 to 0.998         | 0.8848        |
| IL-6+IL-8+TNF- $\alpha$                 | —                    | 90.91           | 100.00          | 0.932 to 0.999         | 0.9091        |
| IL-1 $\beta$ +IL-8+IL-6                 | —                    | 79.45           | 100.00          | 0.907 to 0.990         | 0.7945        |
| IL-1 $\beta$ +IL-8+TNF- $\alpha$        | —                    | 92.65           | 95.65           | 0.930 to 0.999         | 0.8830        |
| IL-1 $\beta$ +IL-8+TNF- $\alpha$ + IL-6 | —                    | 95.45           | 90.91           | 0.928 to 0.999         | 0.8636        |

ROC, Receiver Operating Characteristic; TB, tuberculosis infection; CPA-TB, tuberculosis infection and GM positive; CPA+, GM positive and Tumors/Pneumonia;

**IL-1 $\beta$** 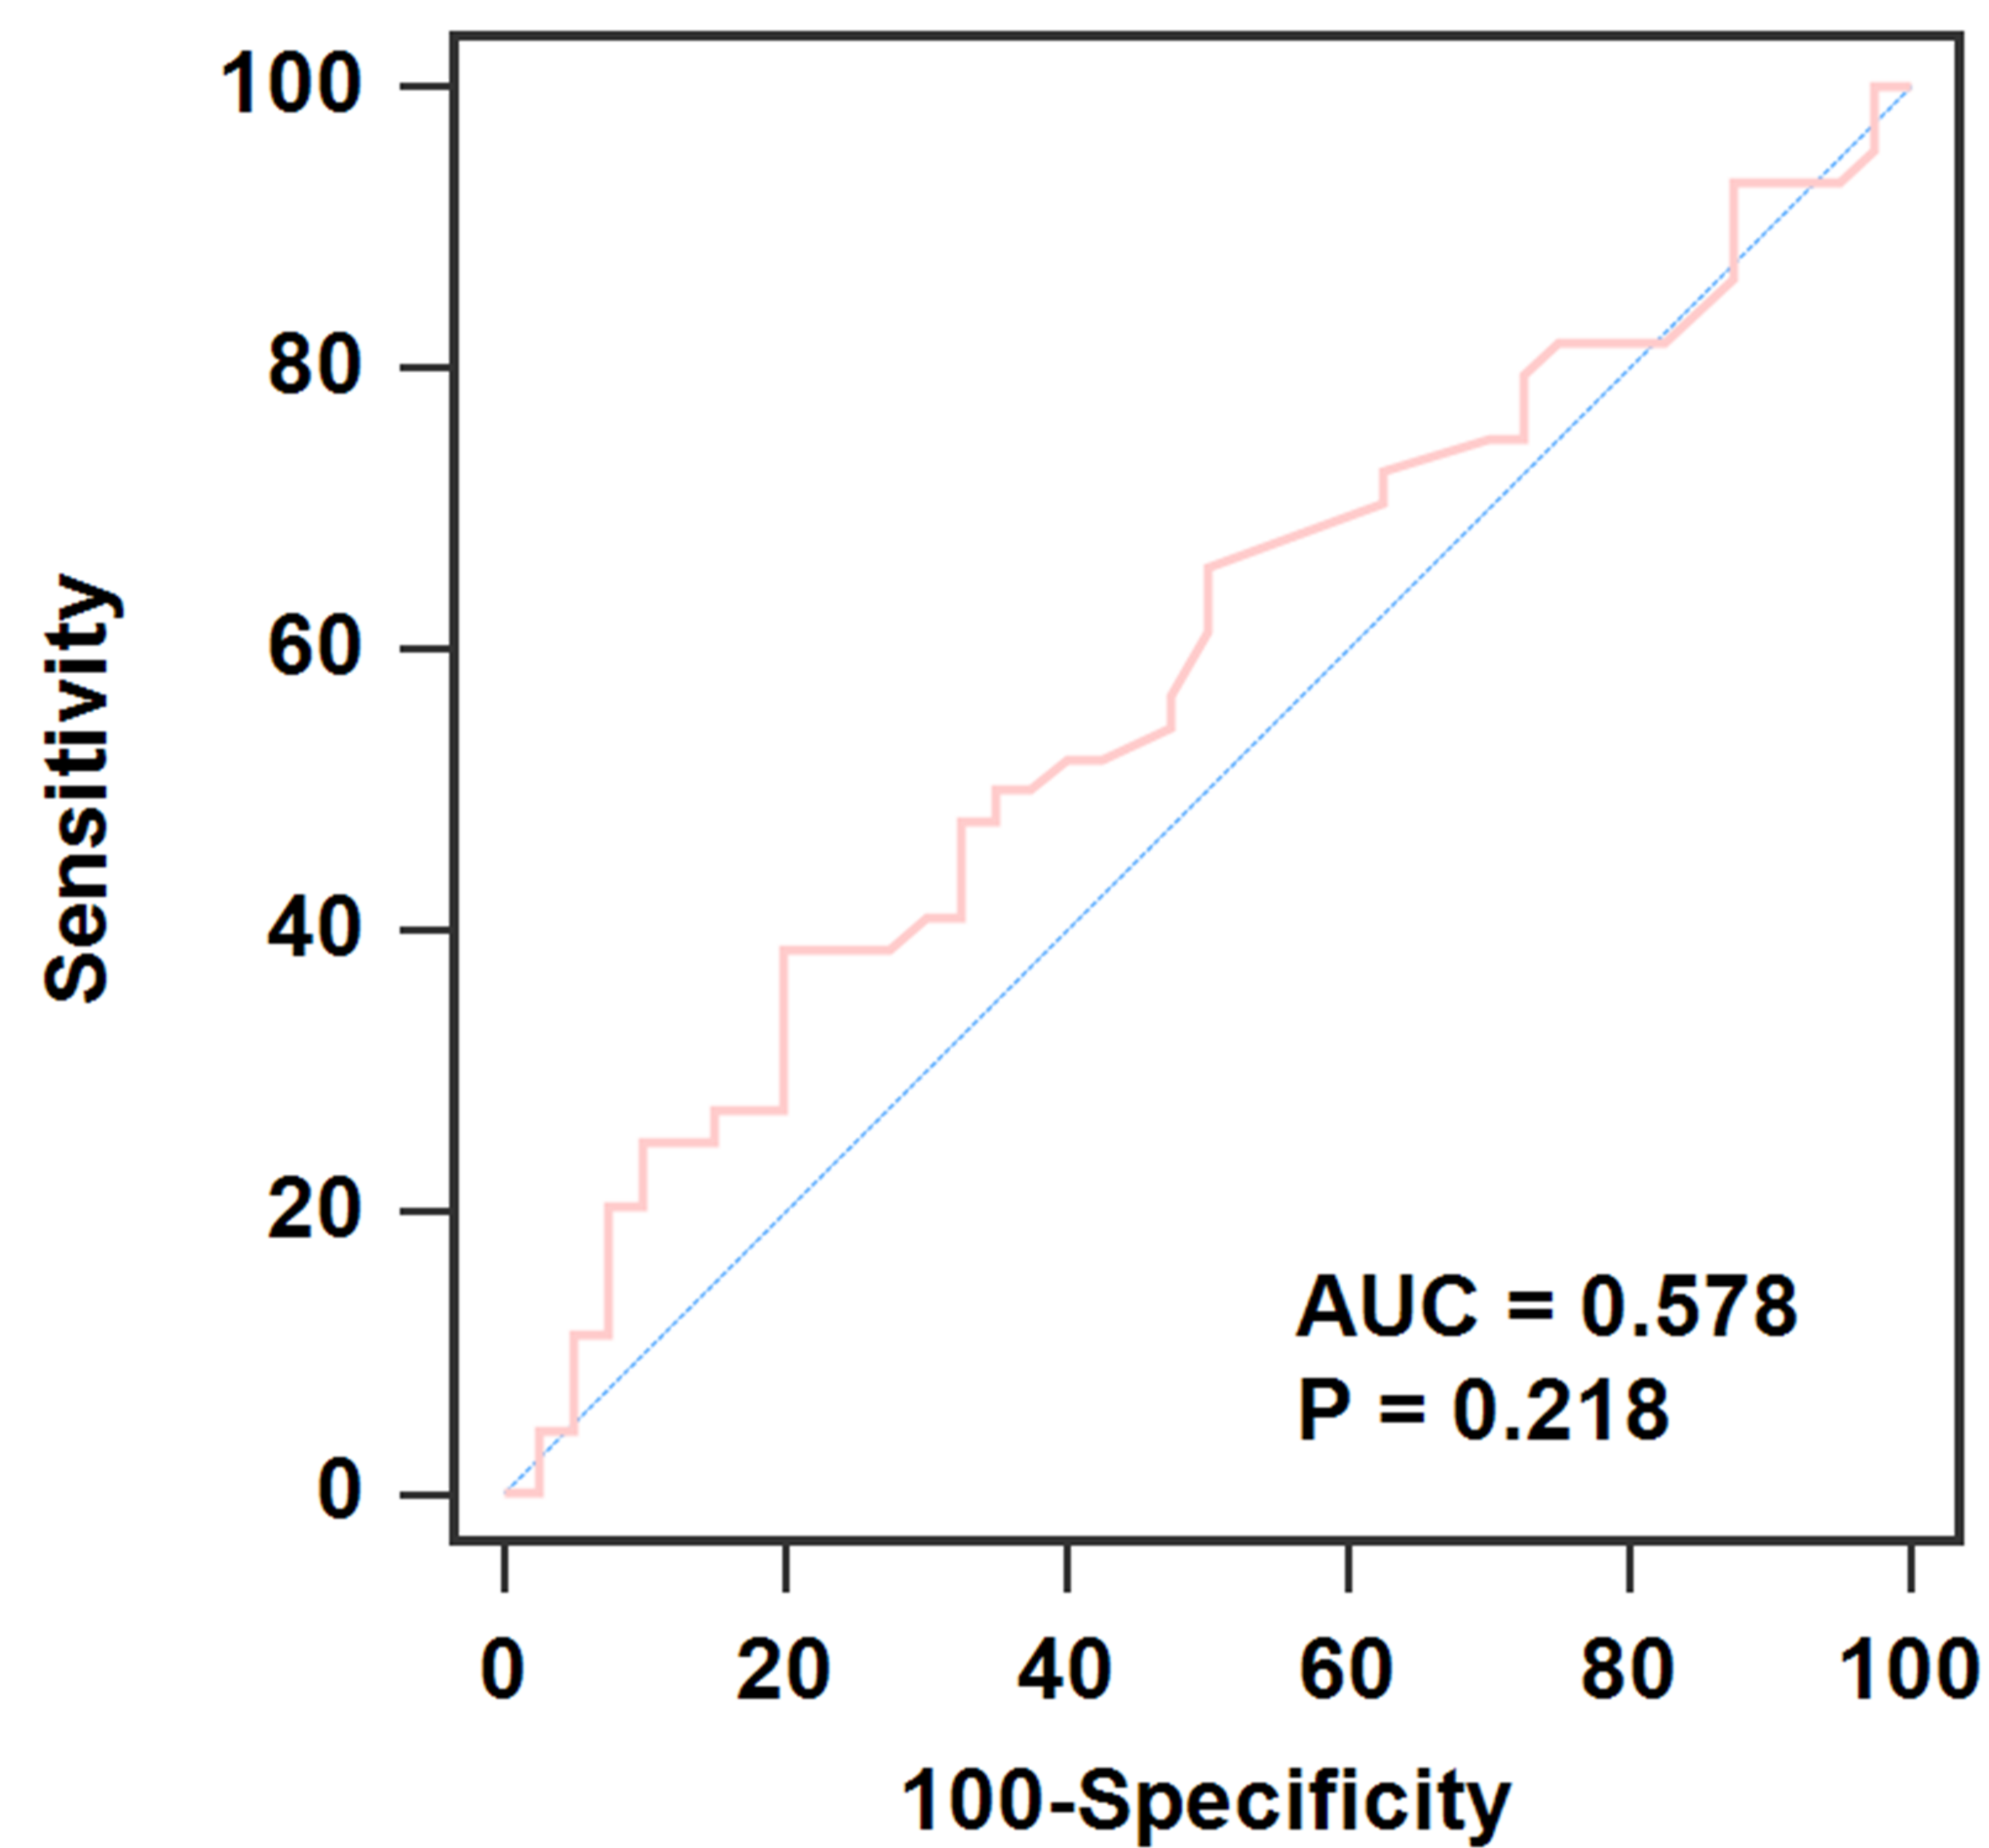**IL-4**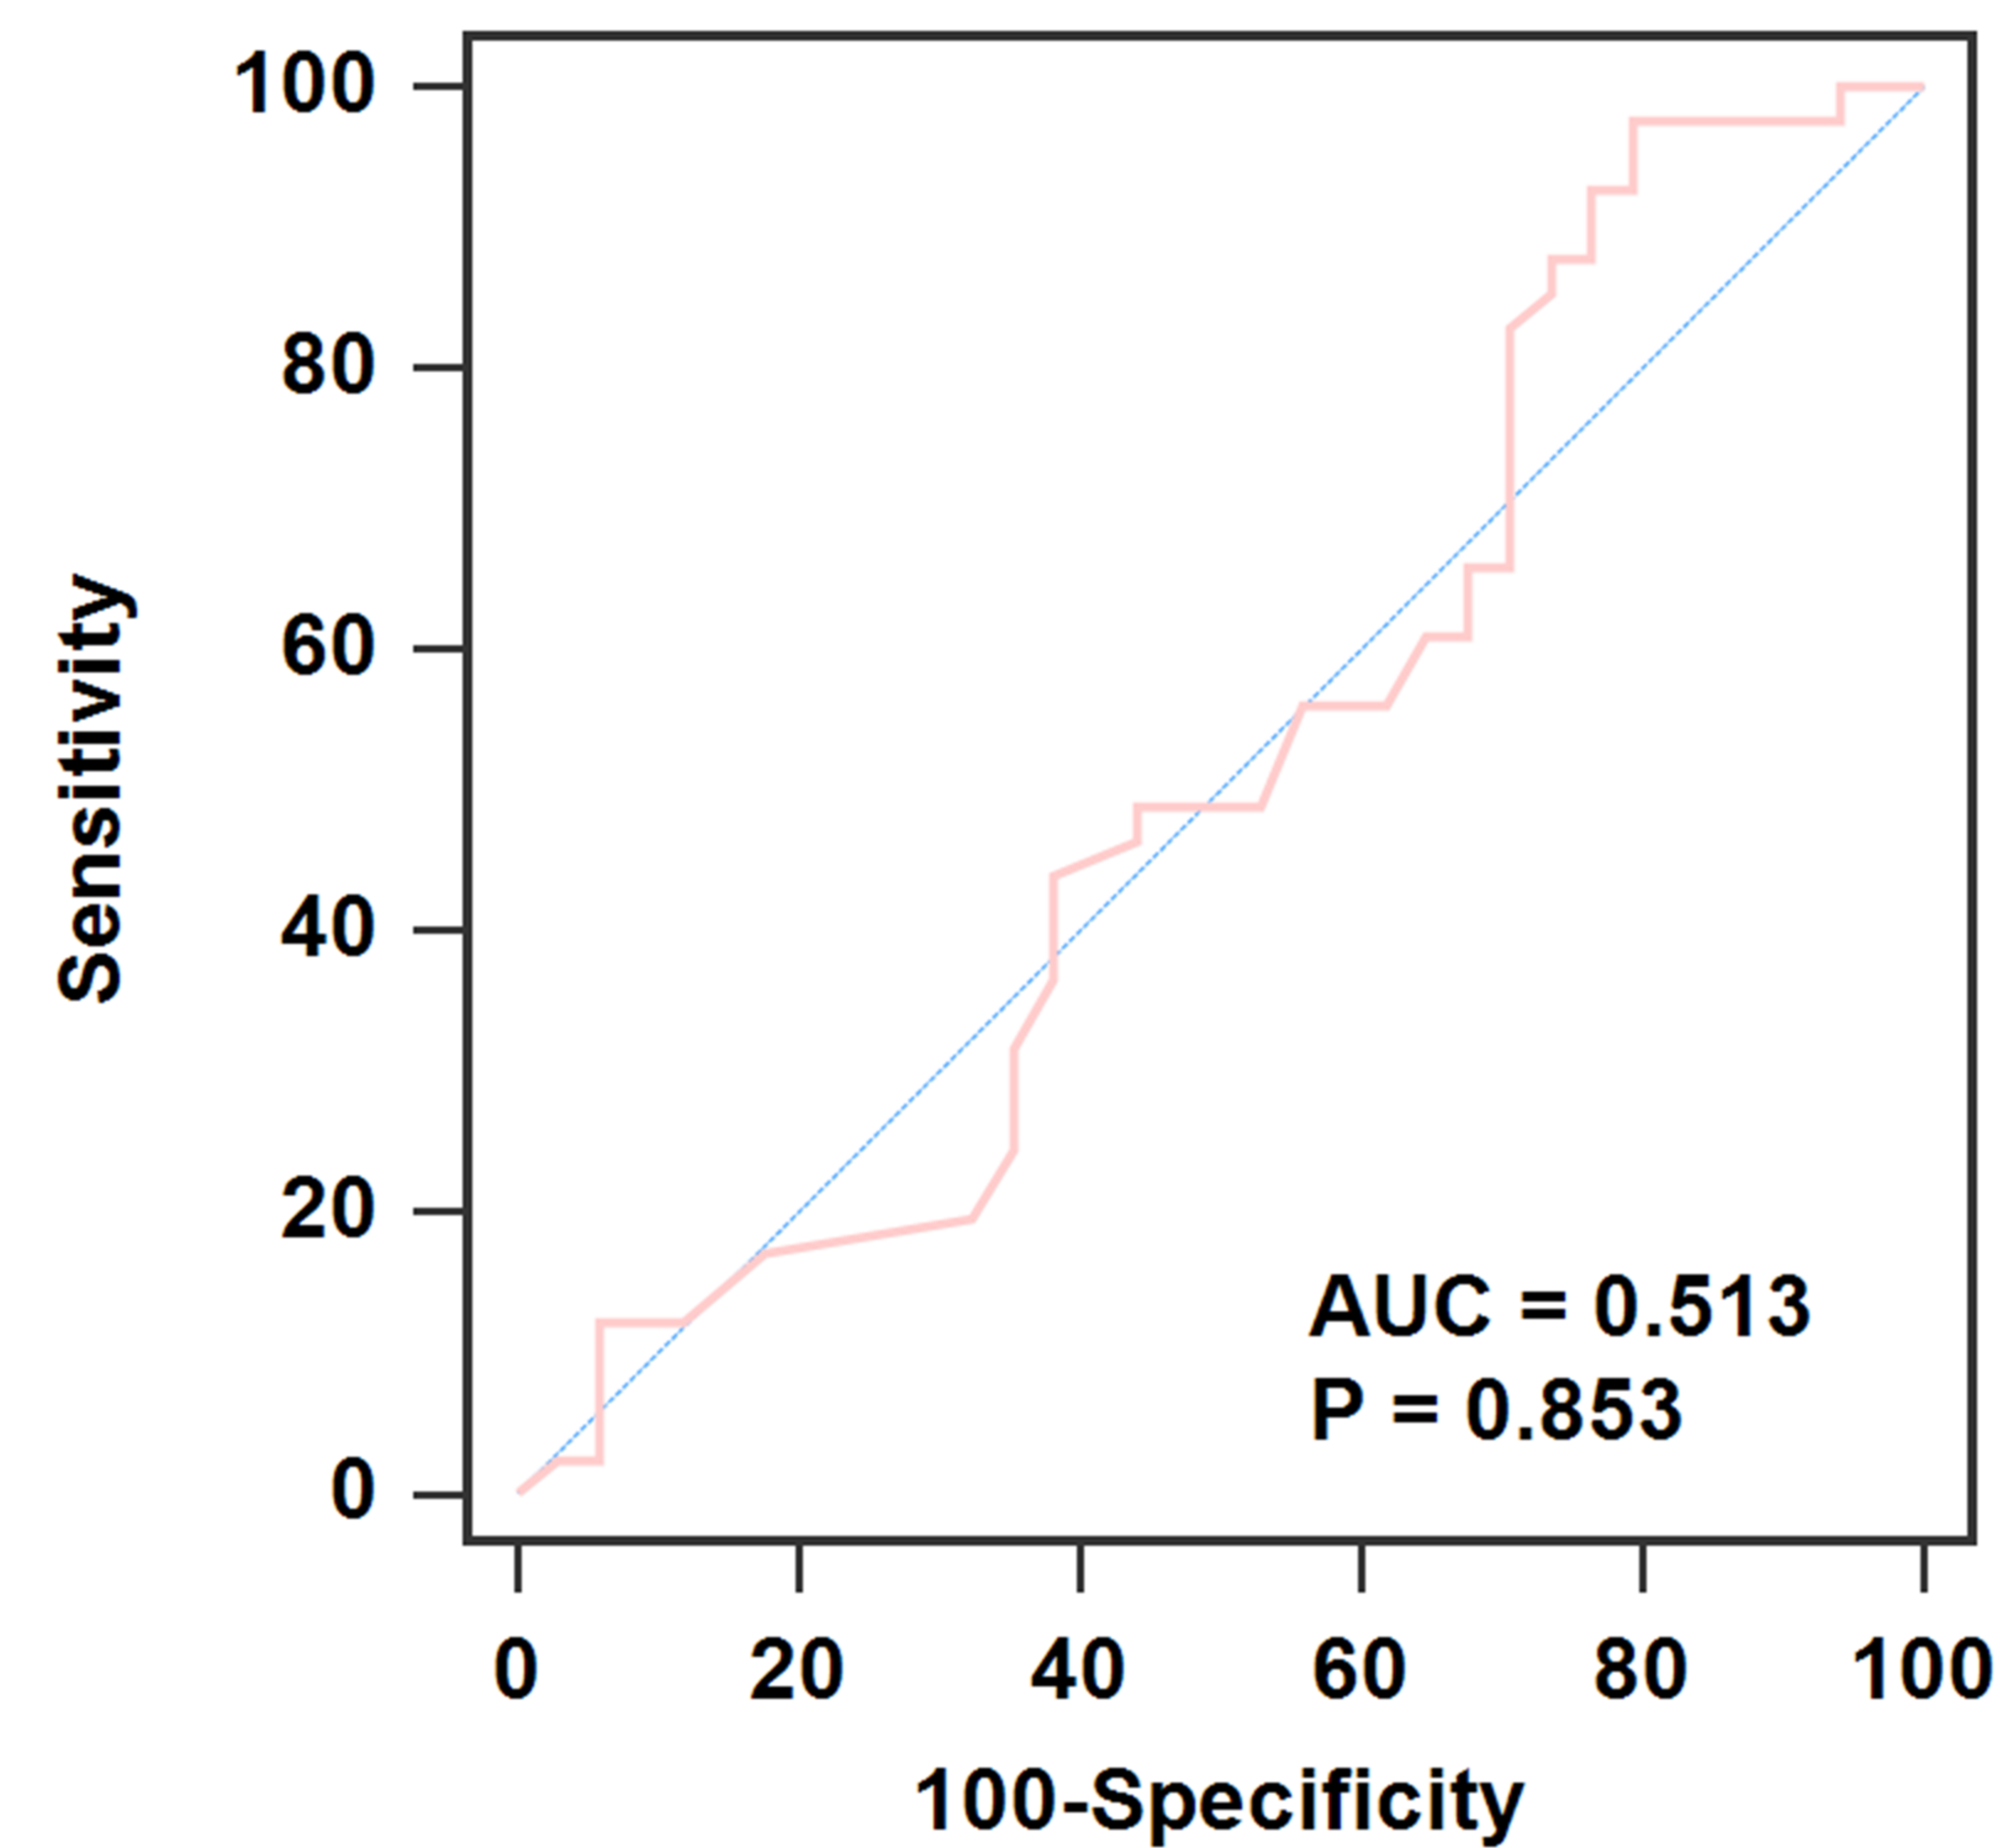**IL-5**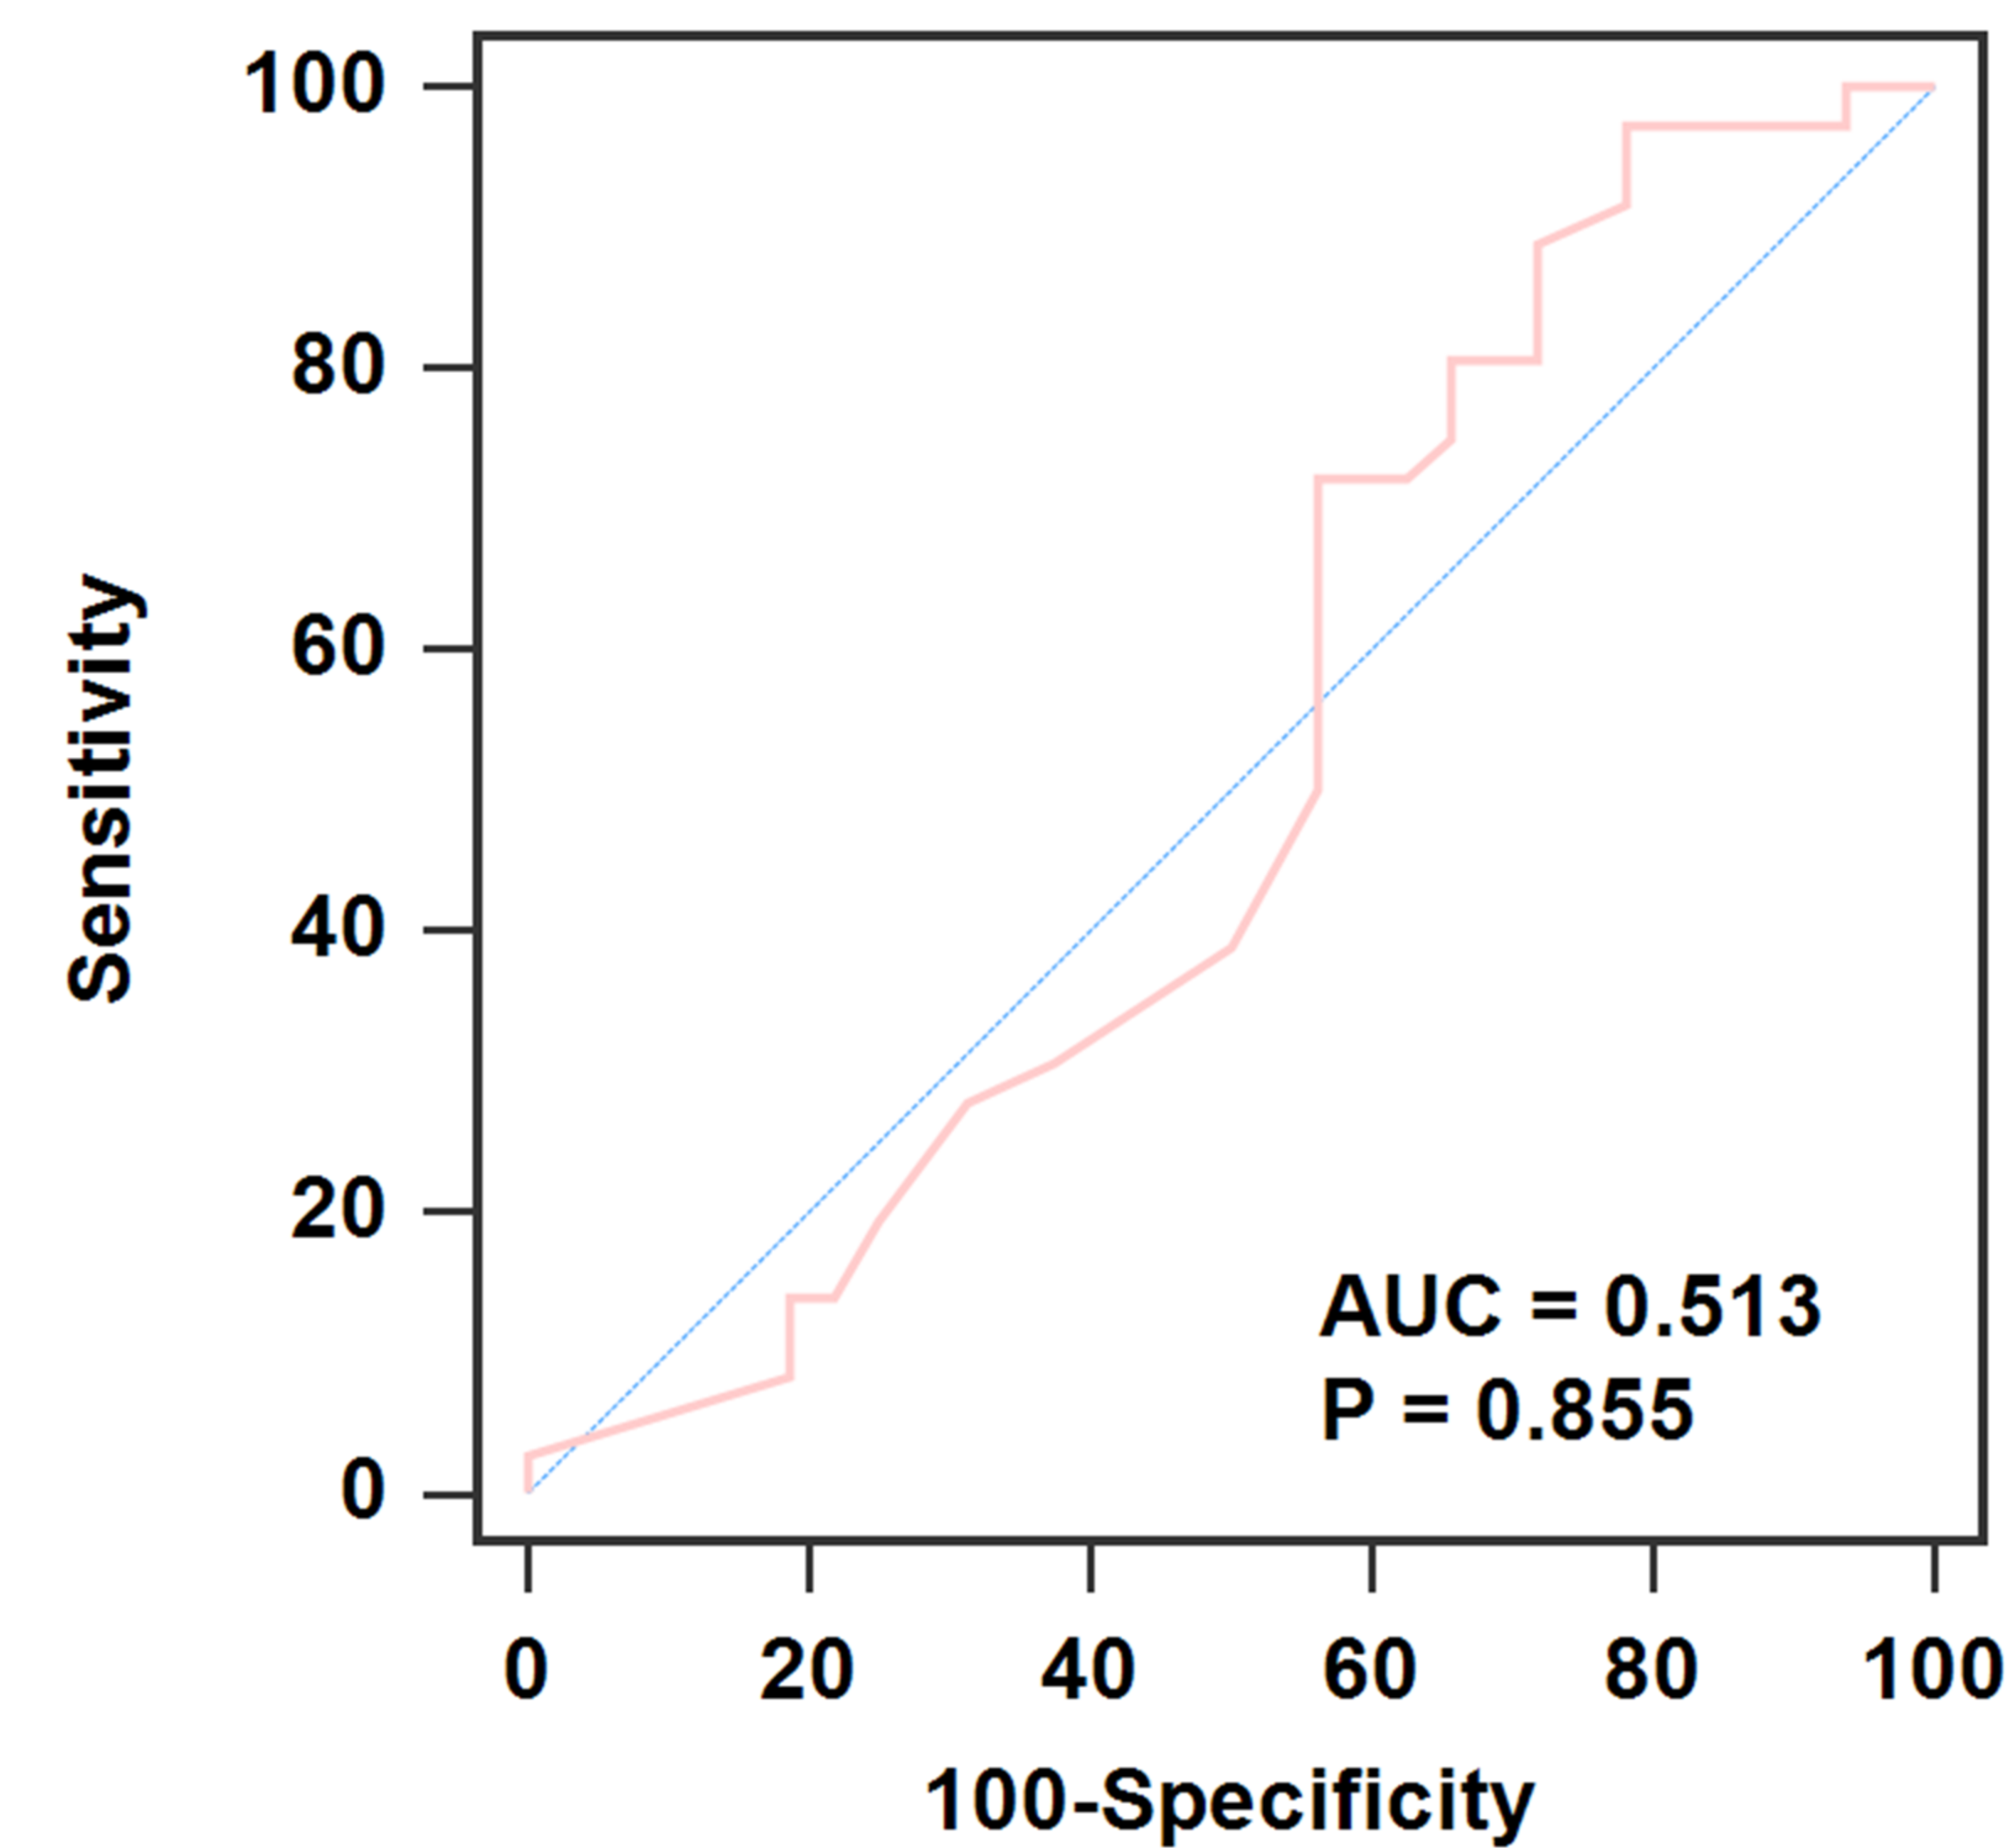**IL-6**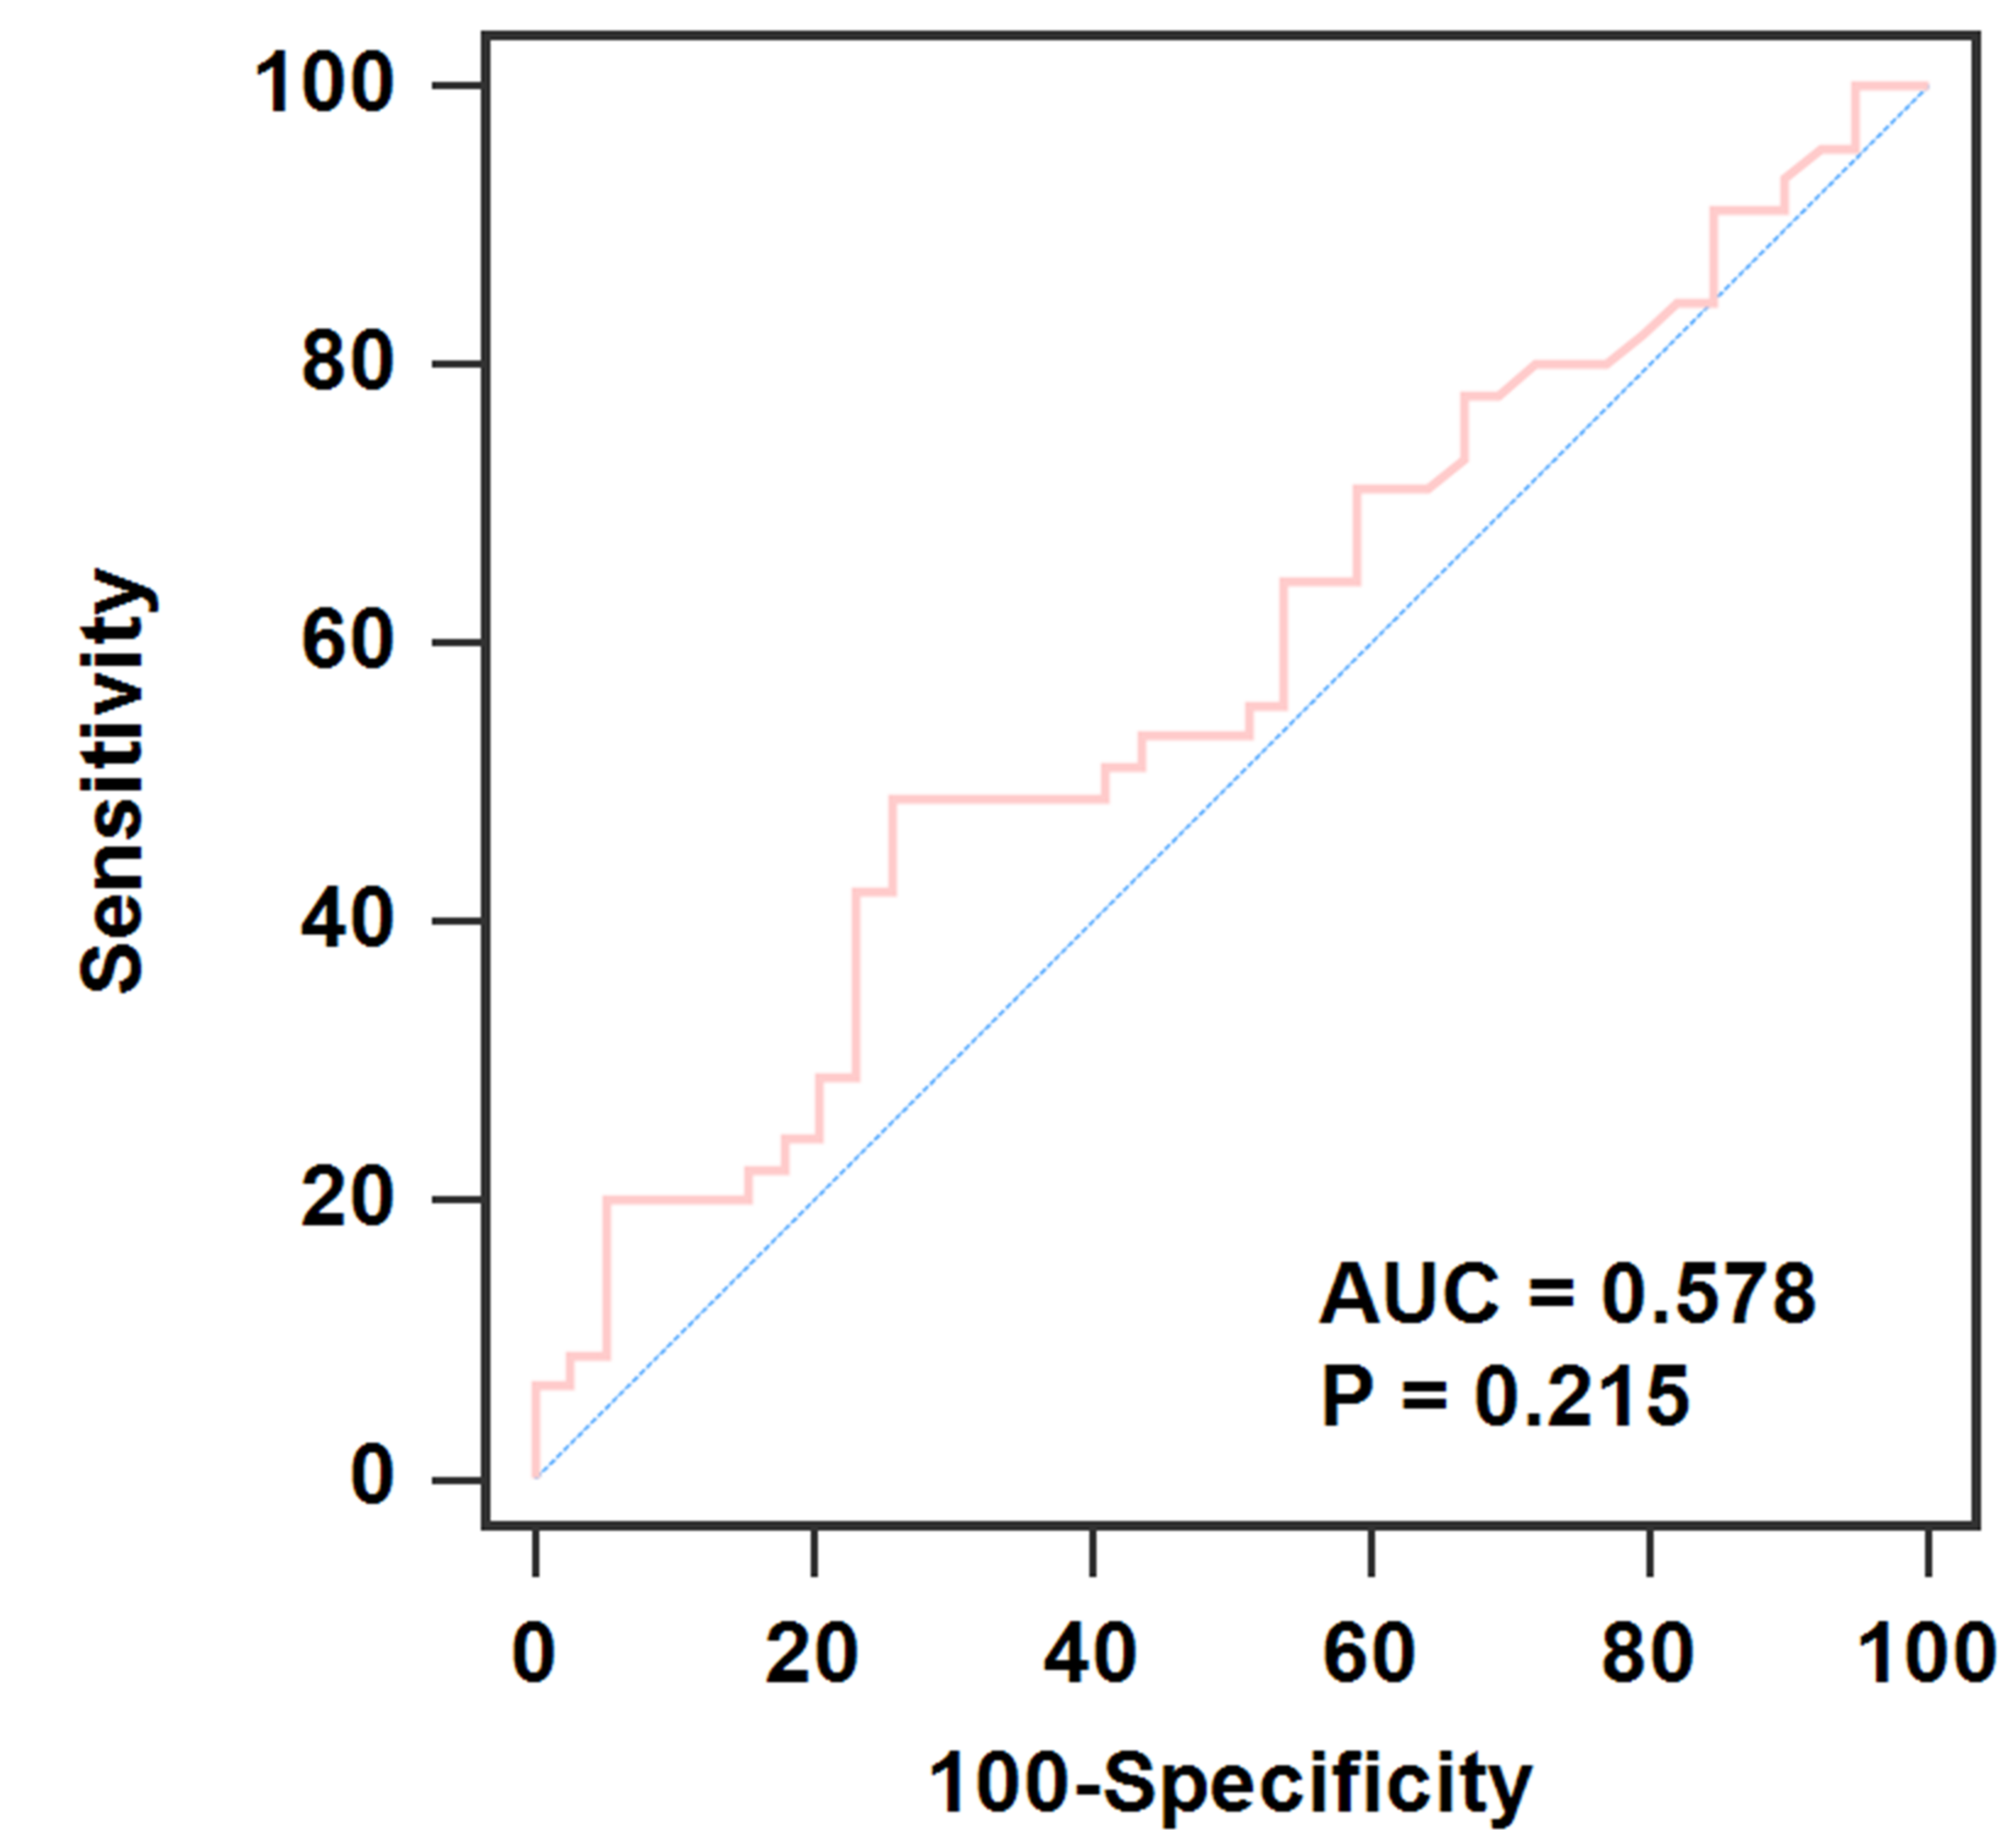**IL-8**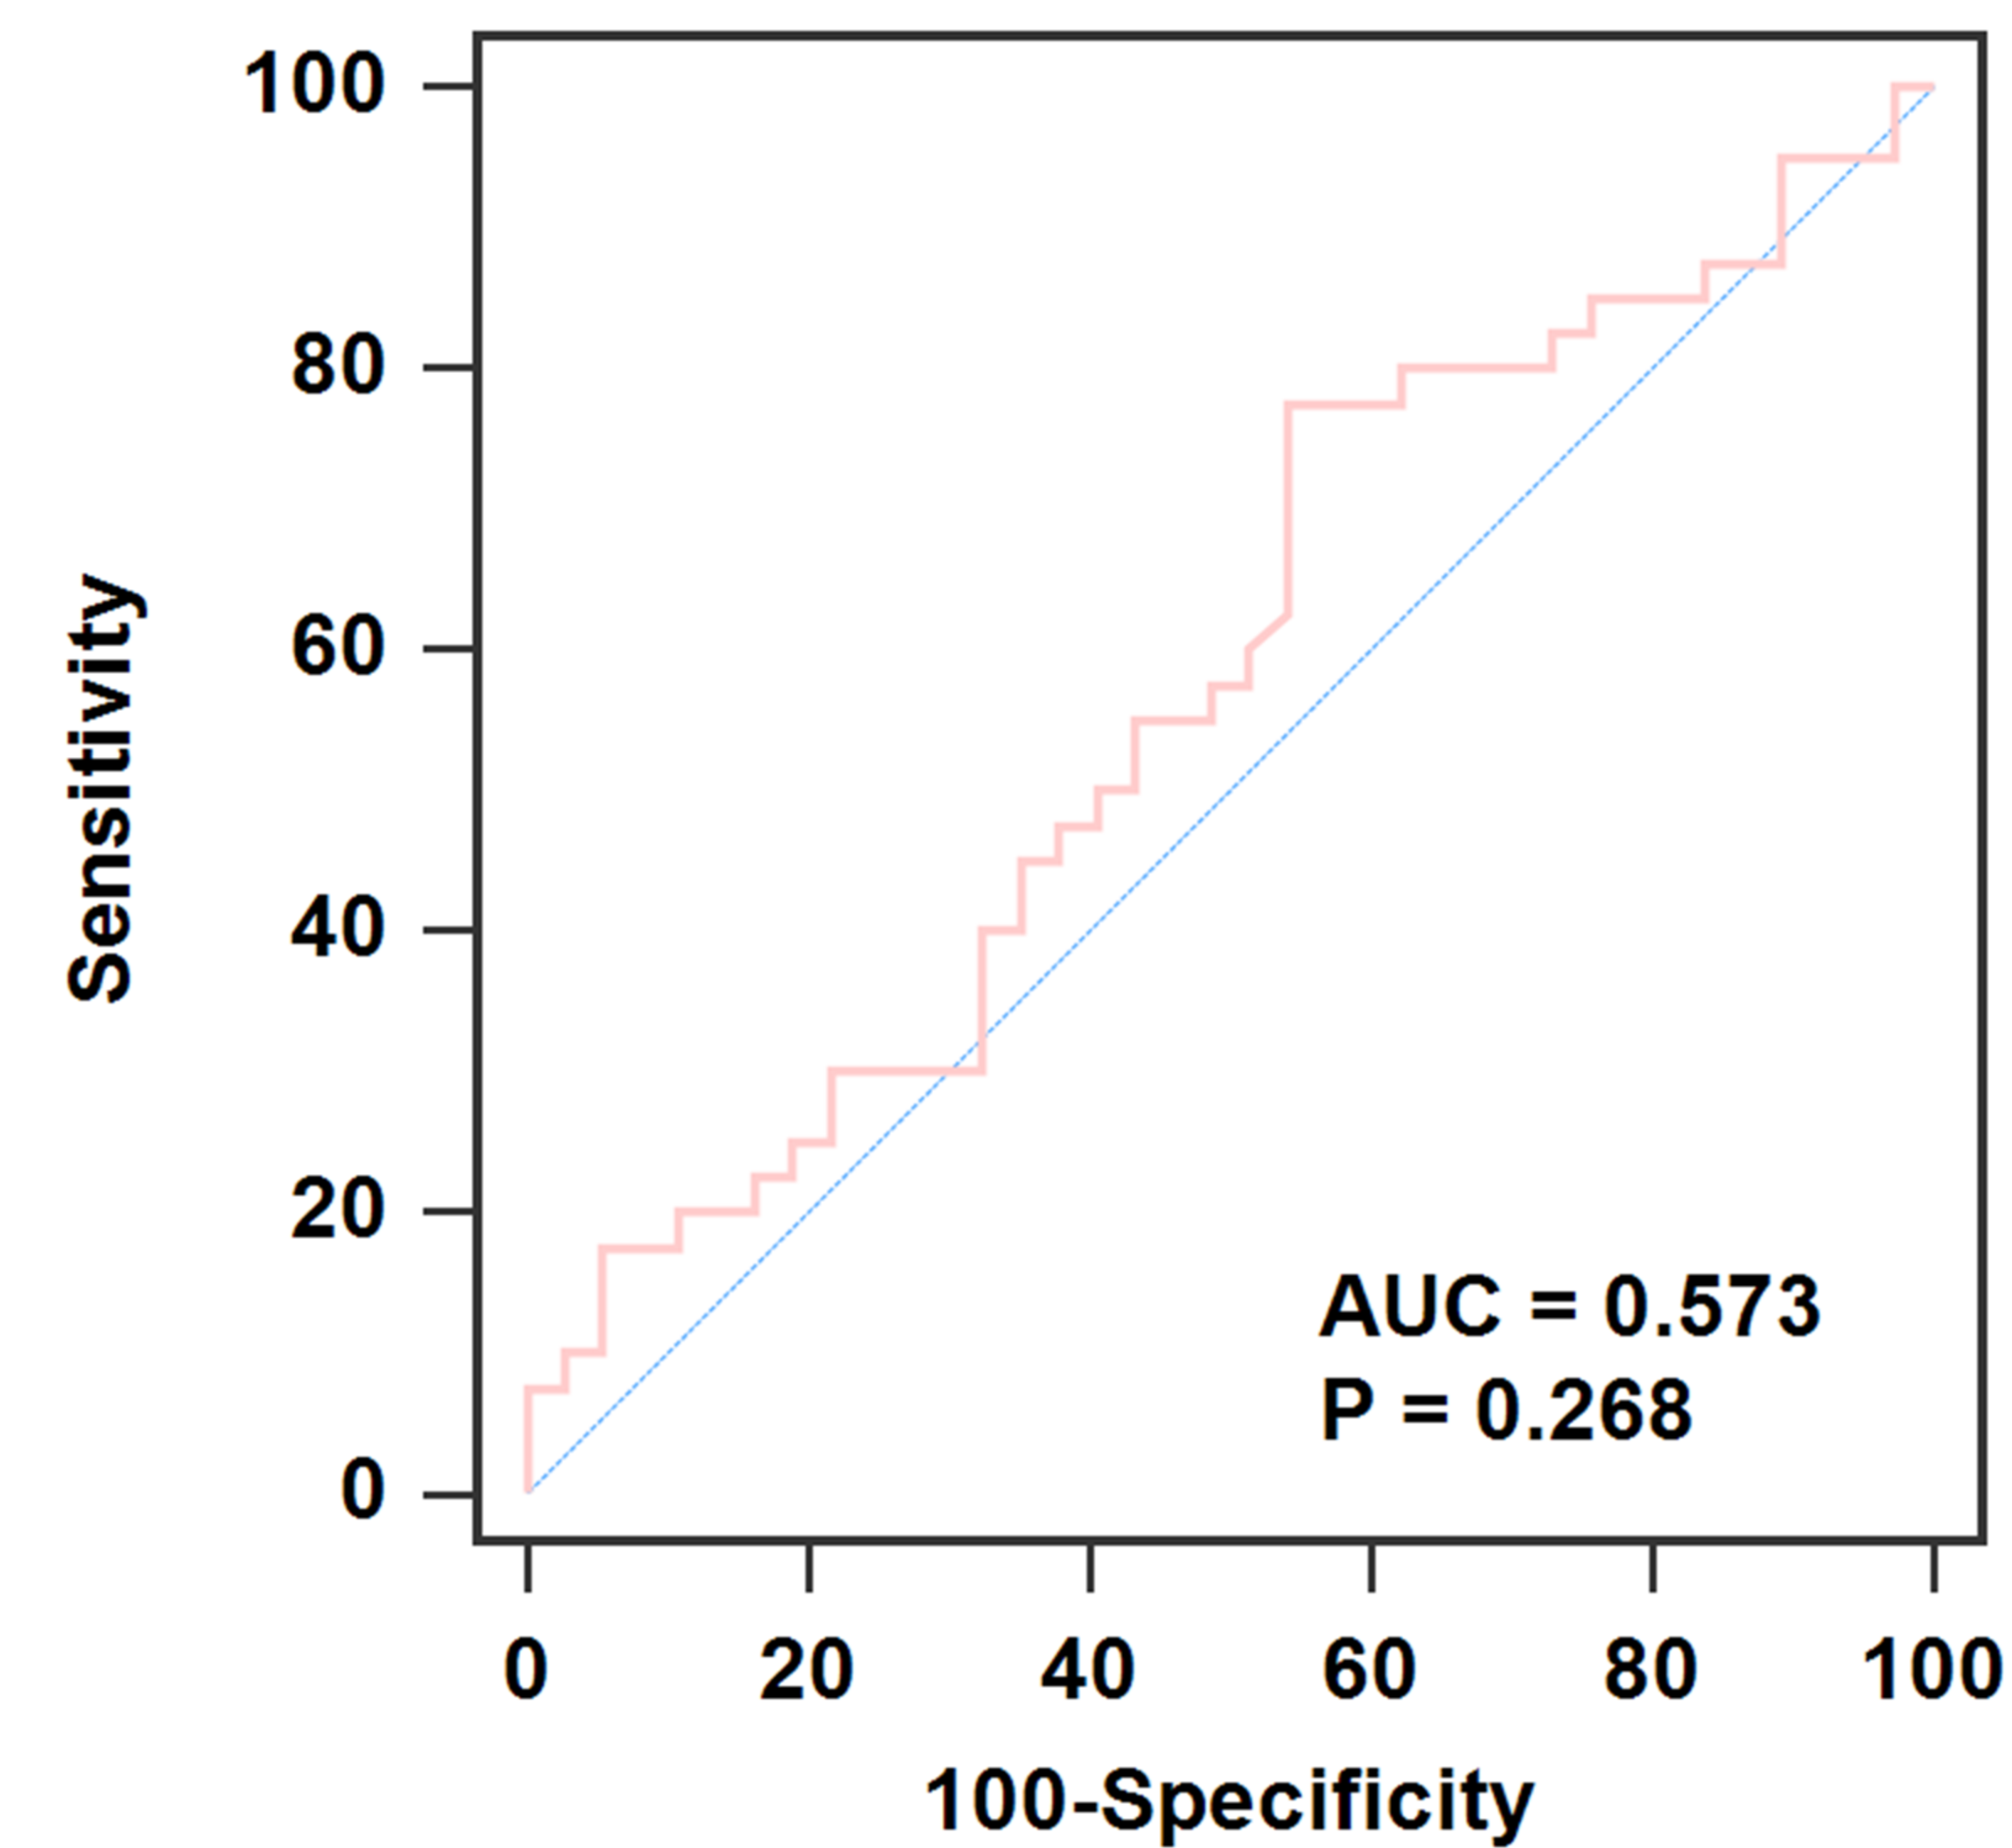**IL-10**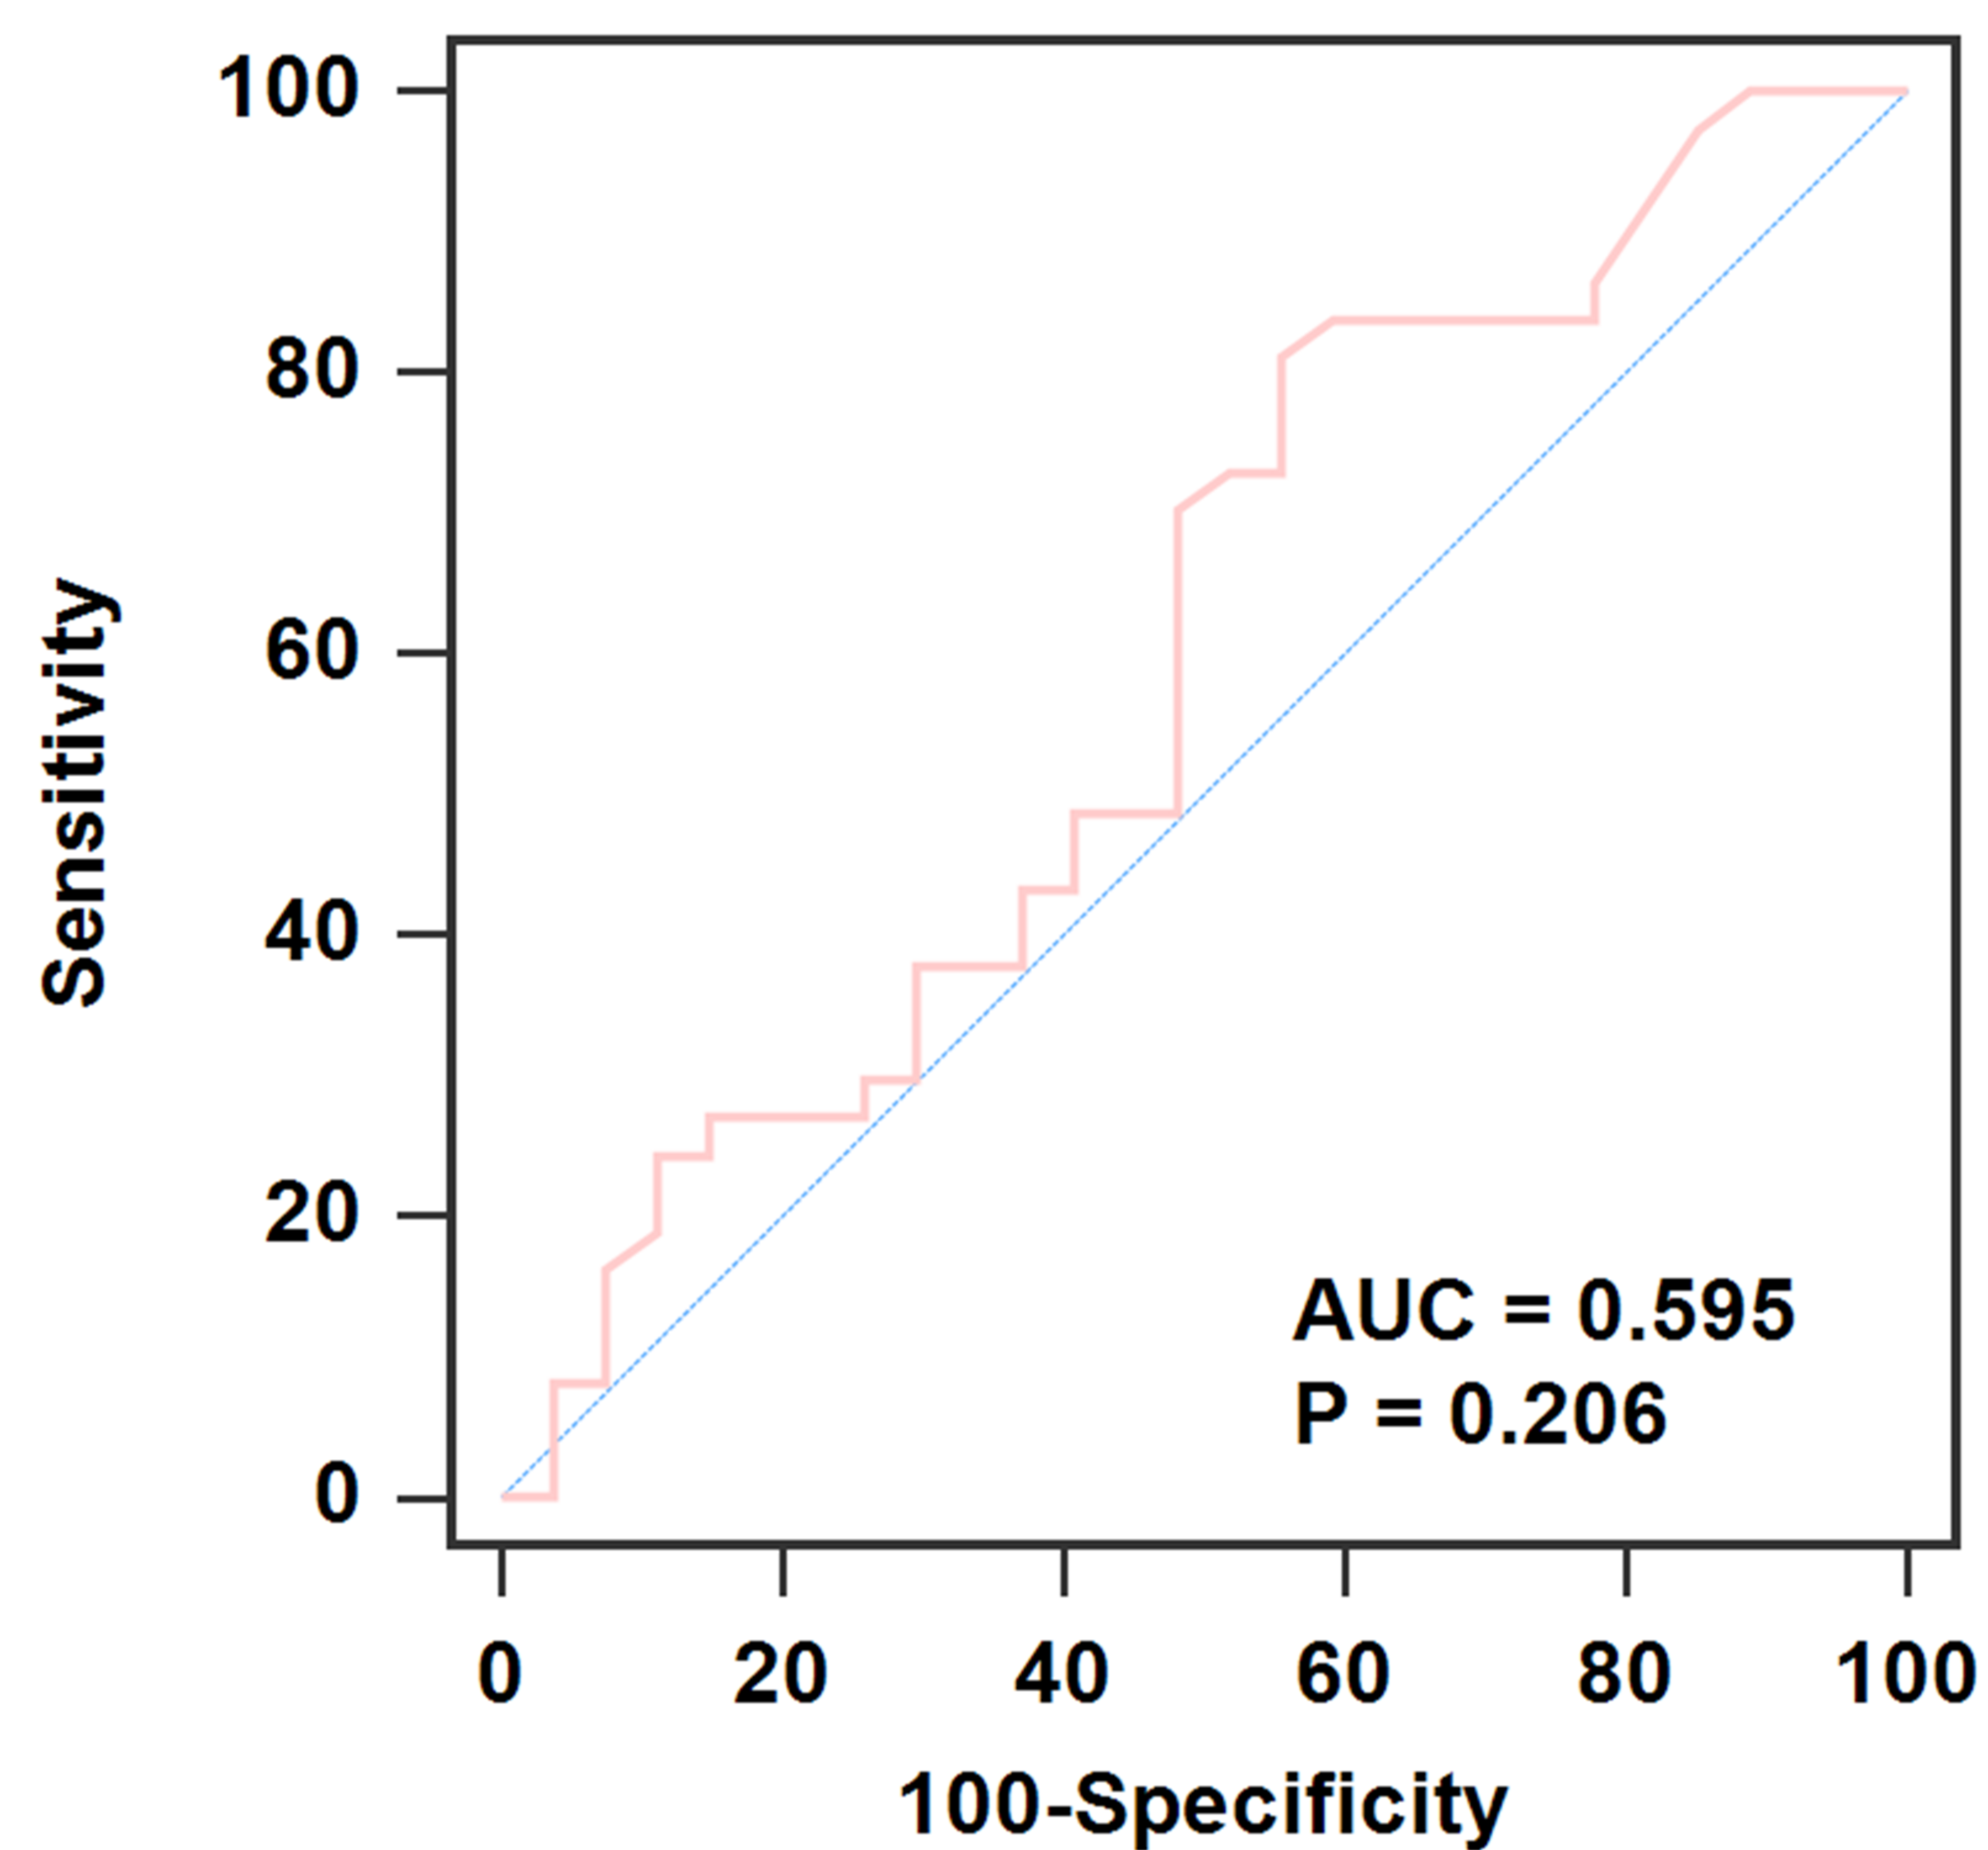**IL-12p70**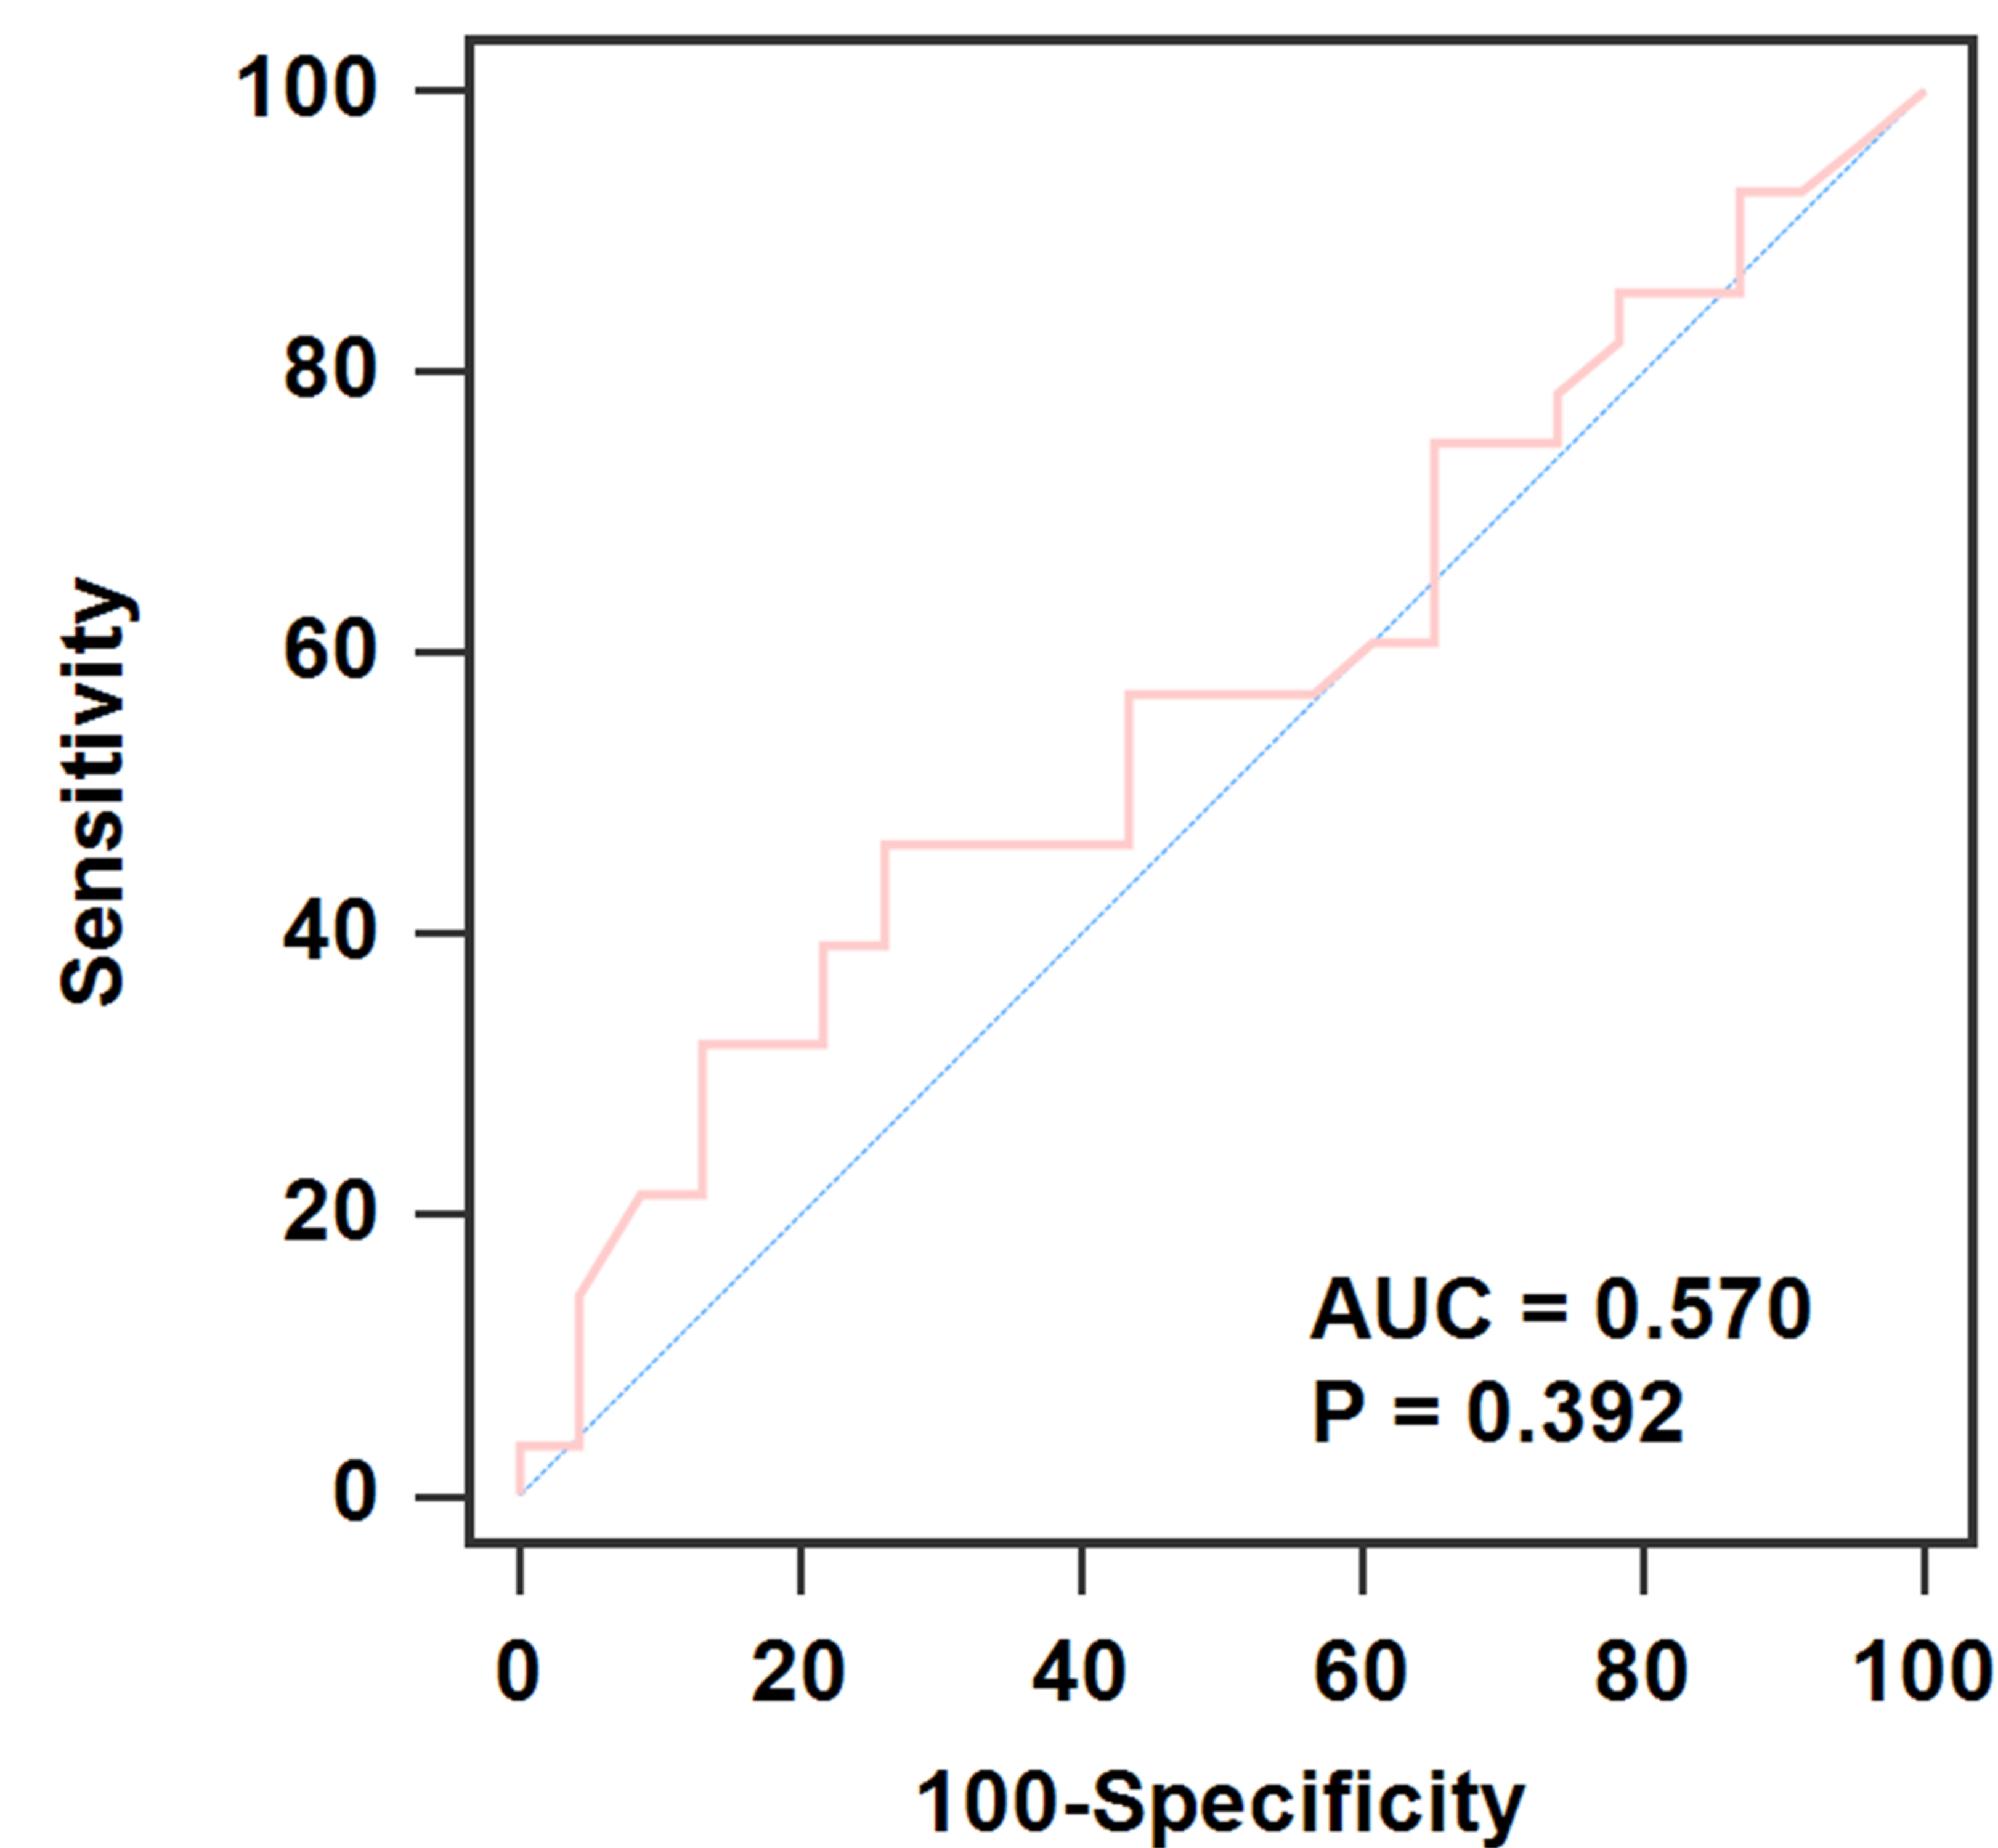**TNF- $\alpha$** 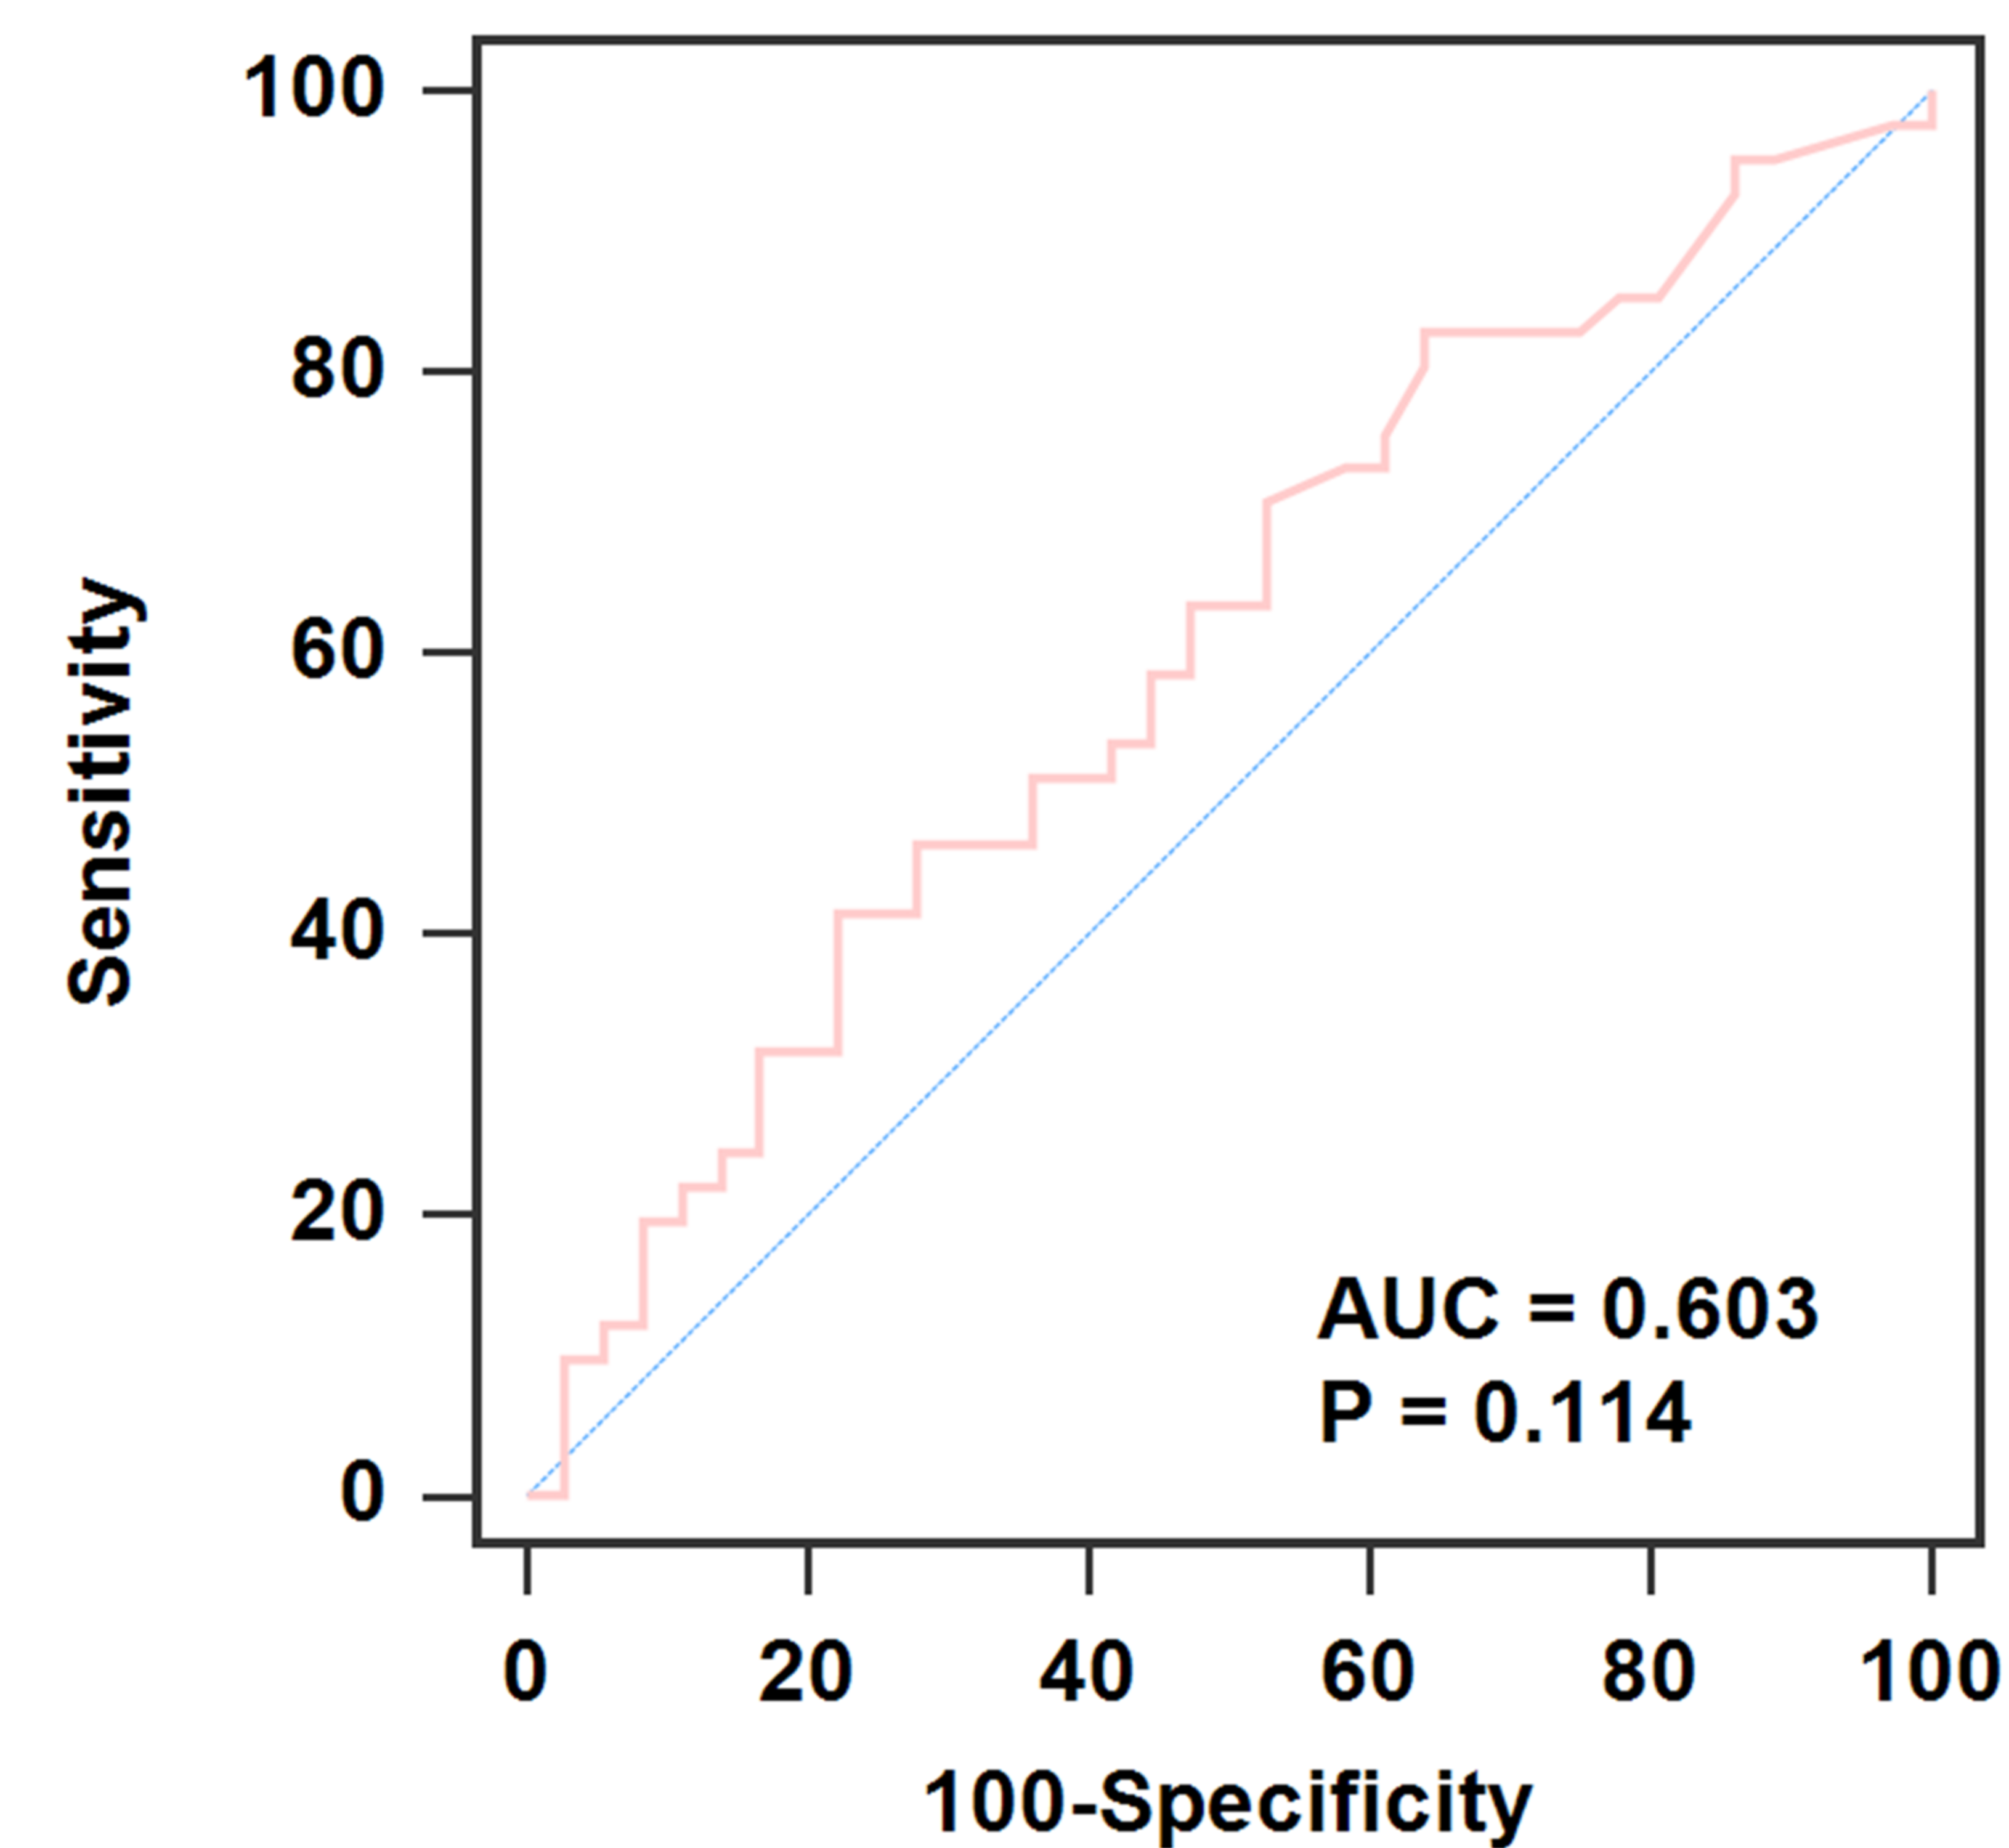**IFN- $\alpha$** 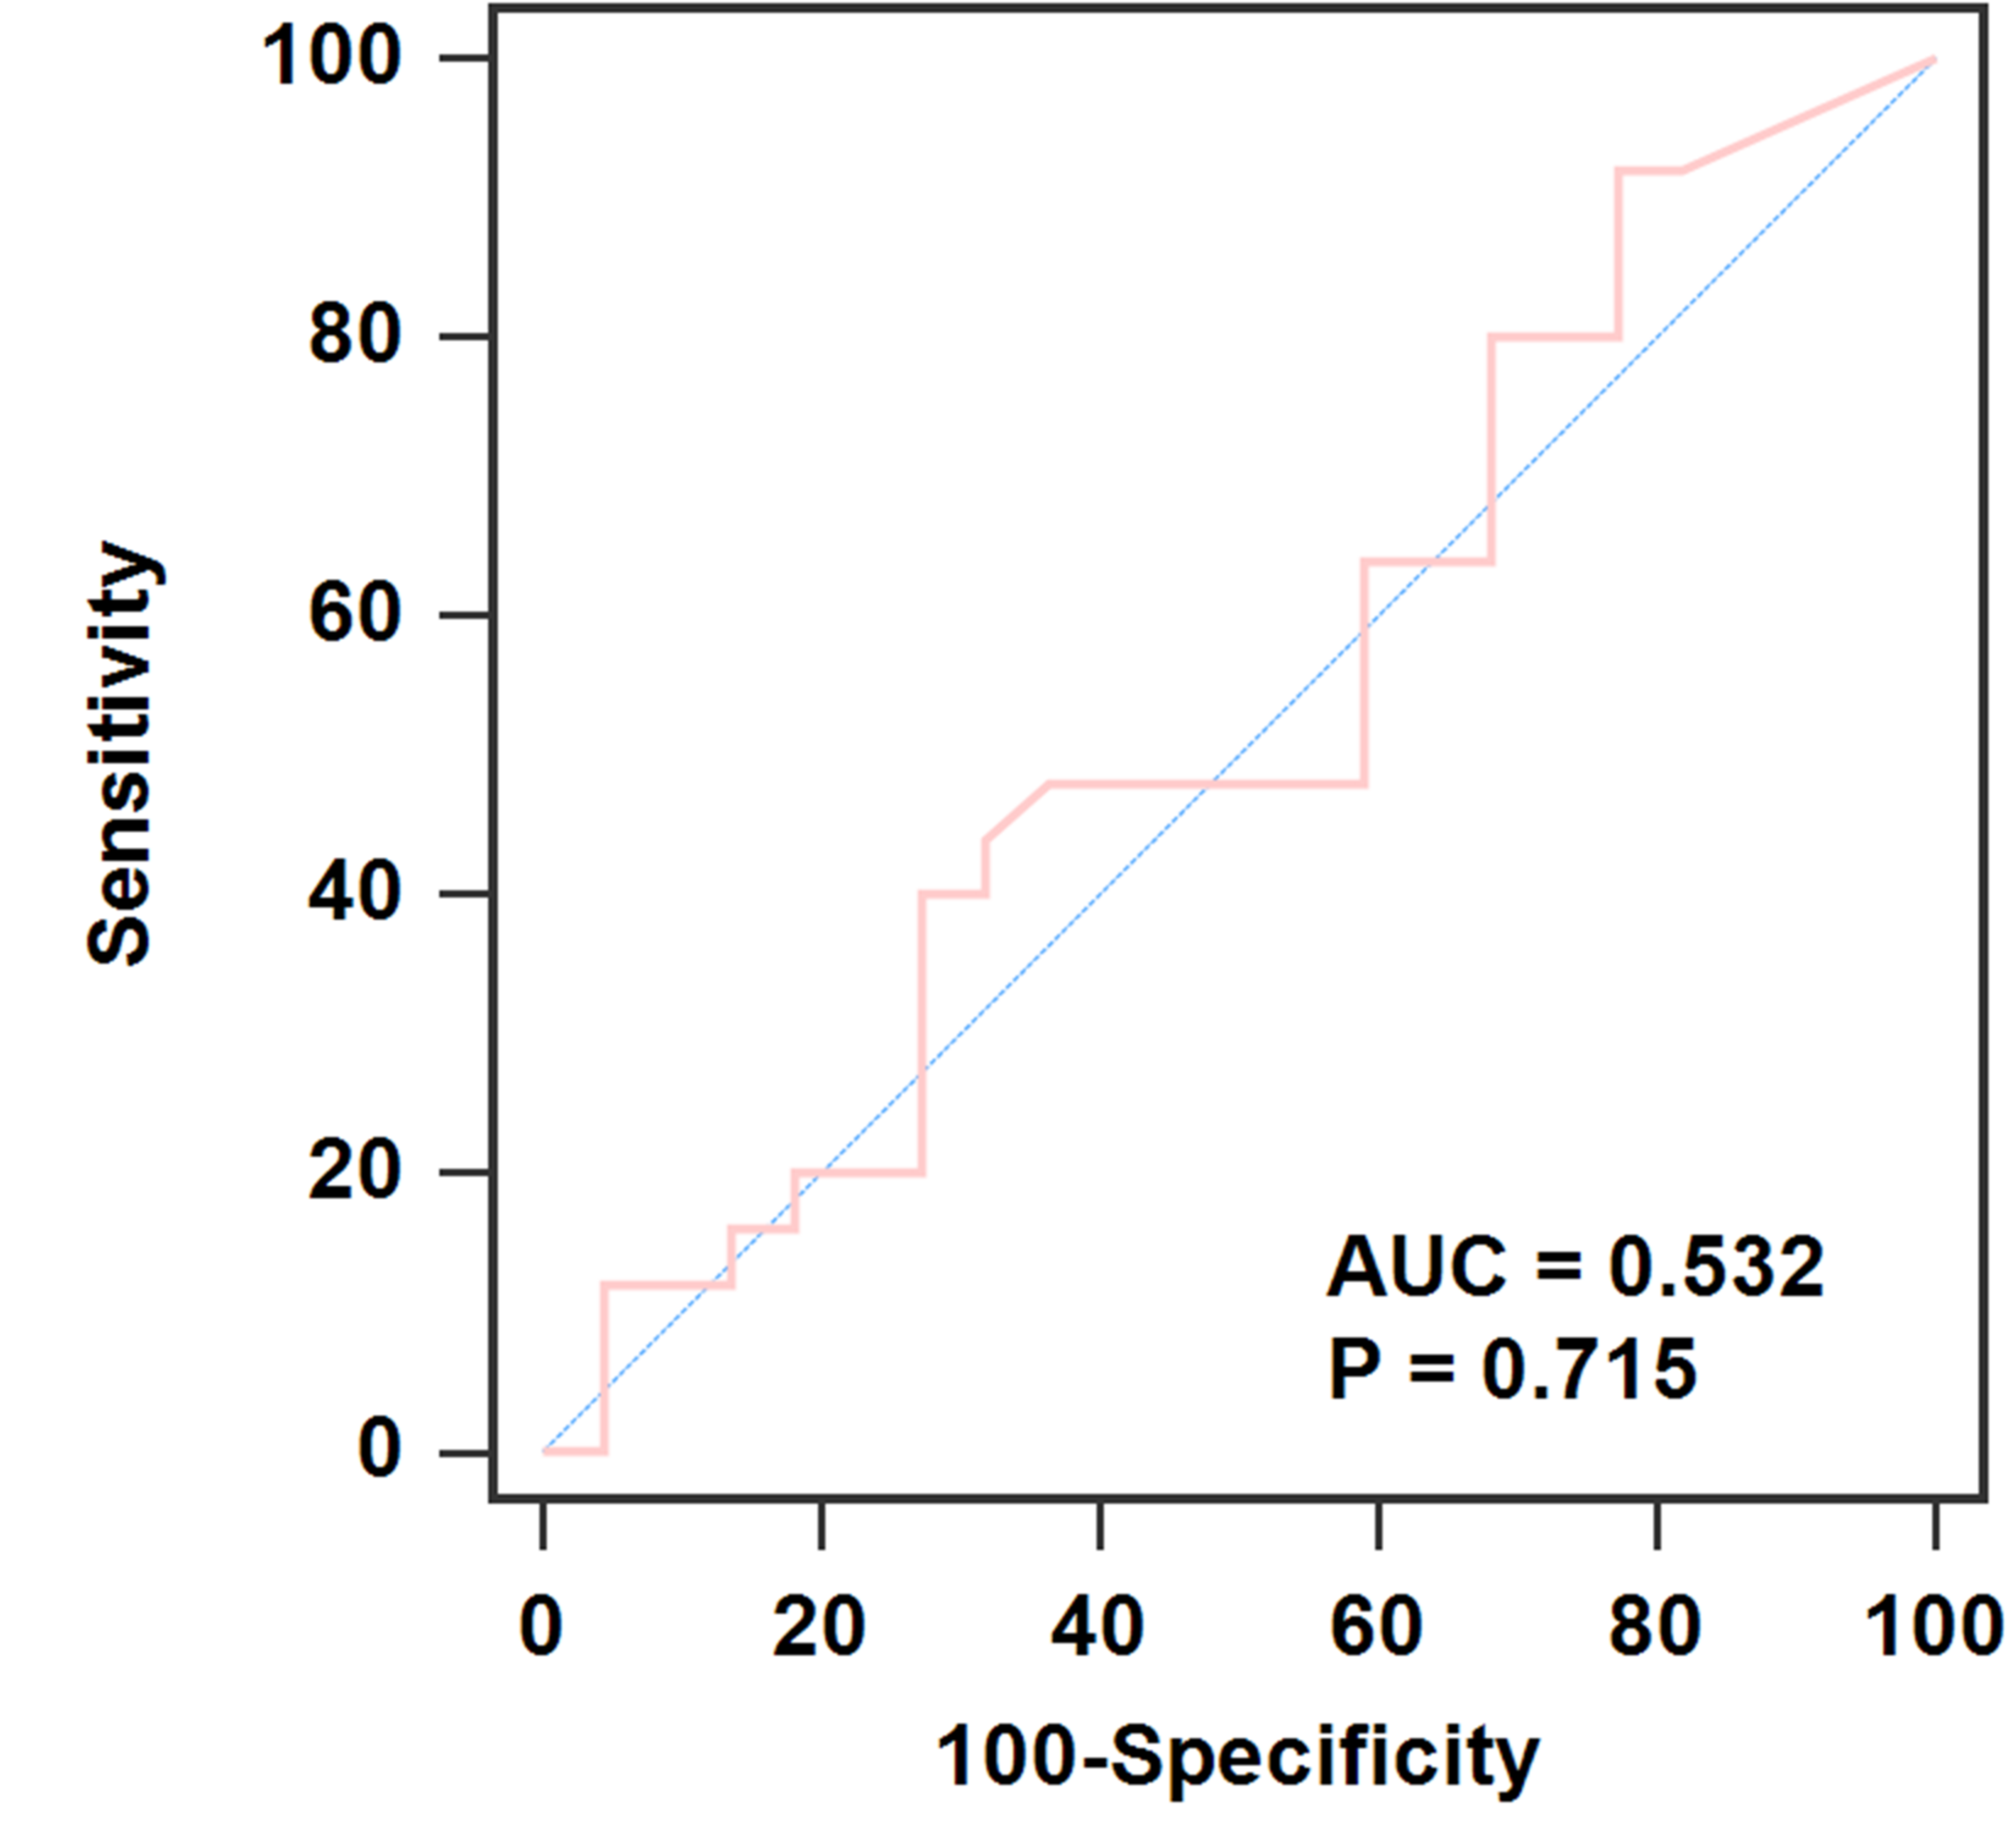**IFN- $\gamma$** 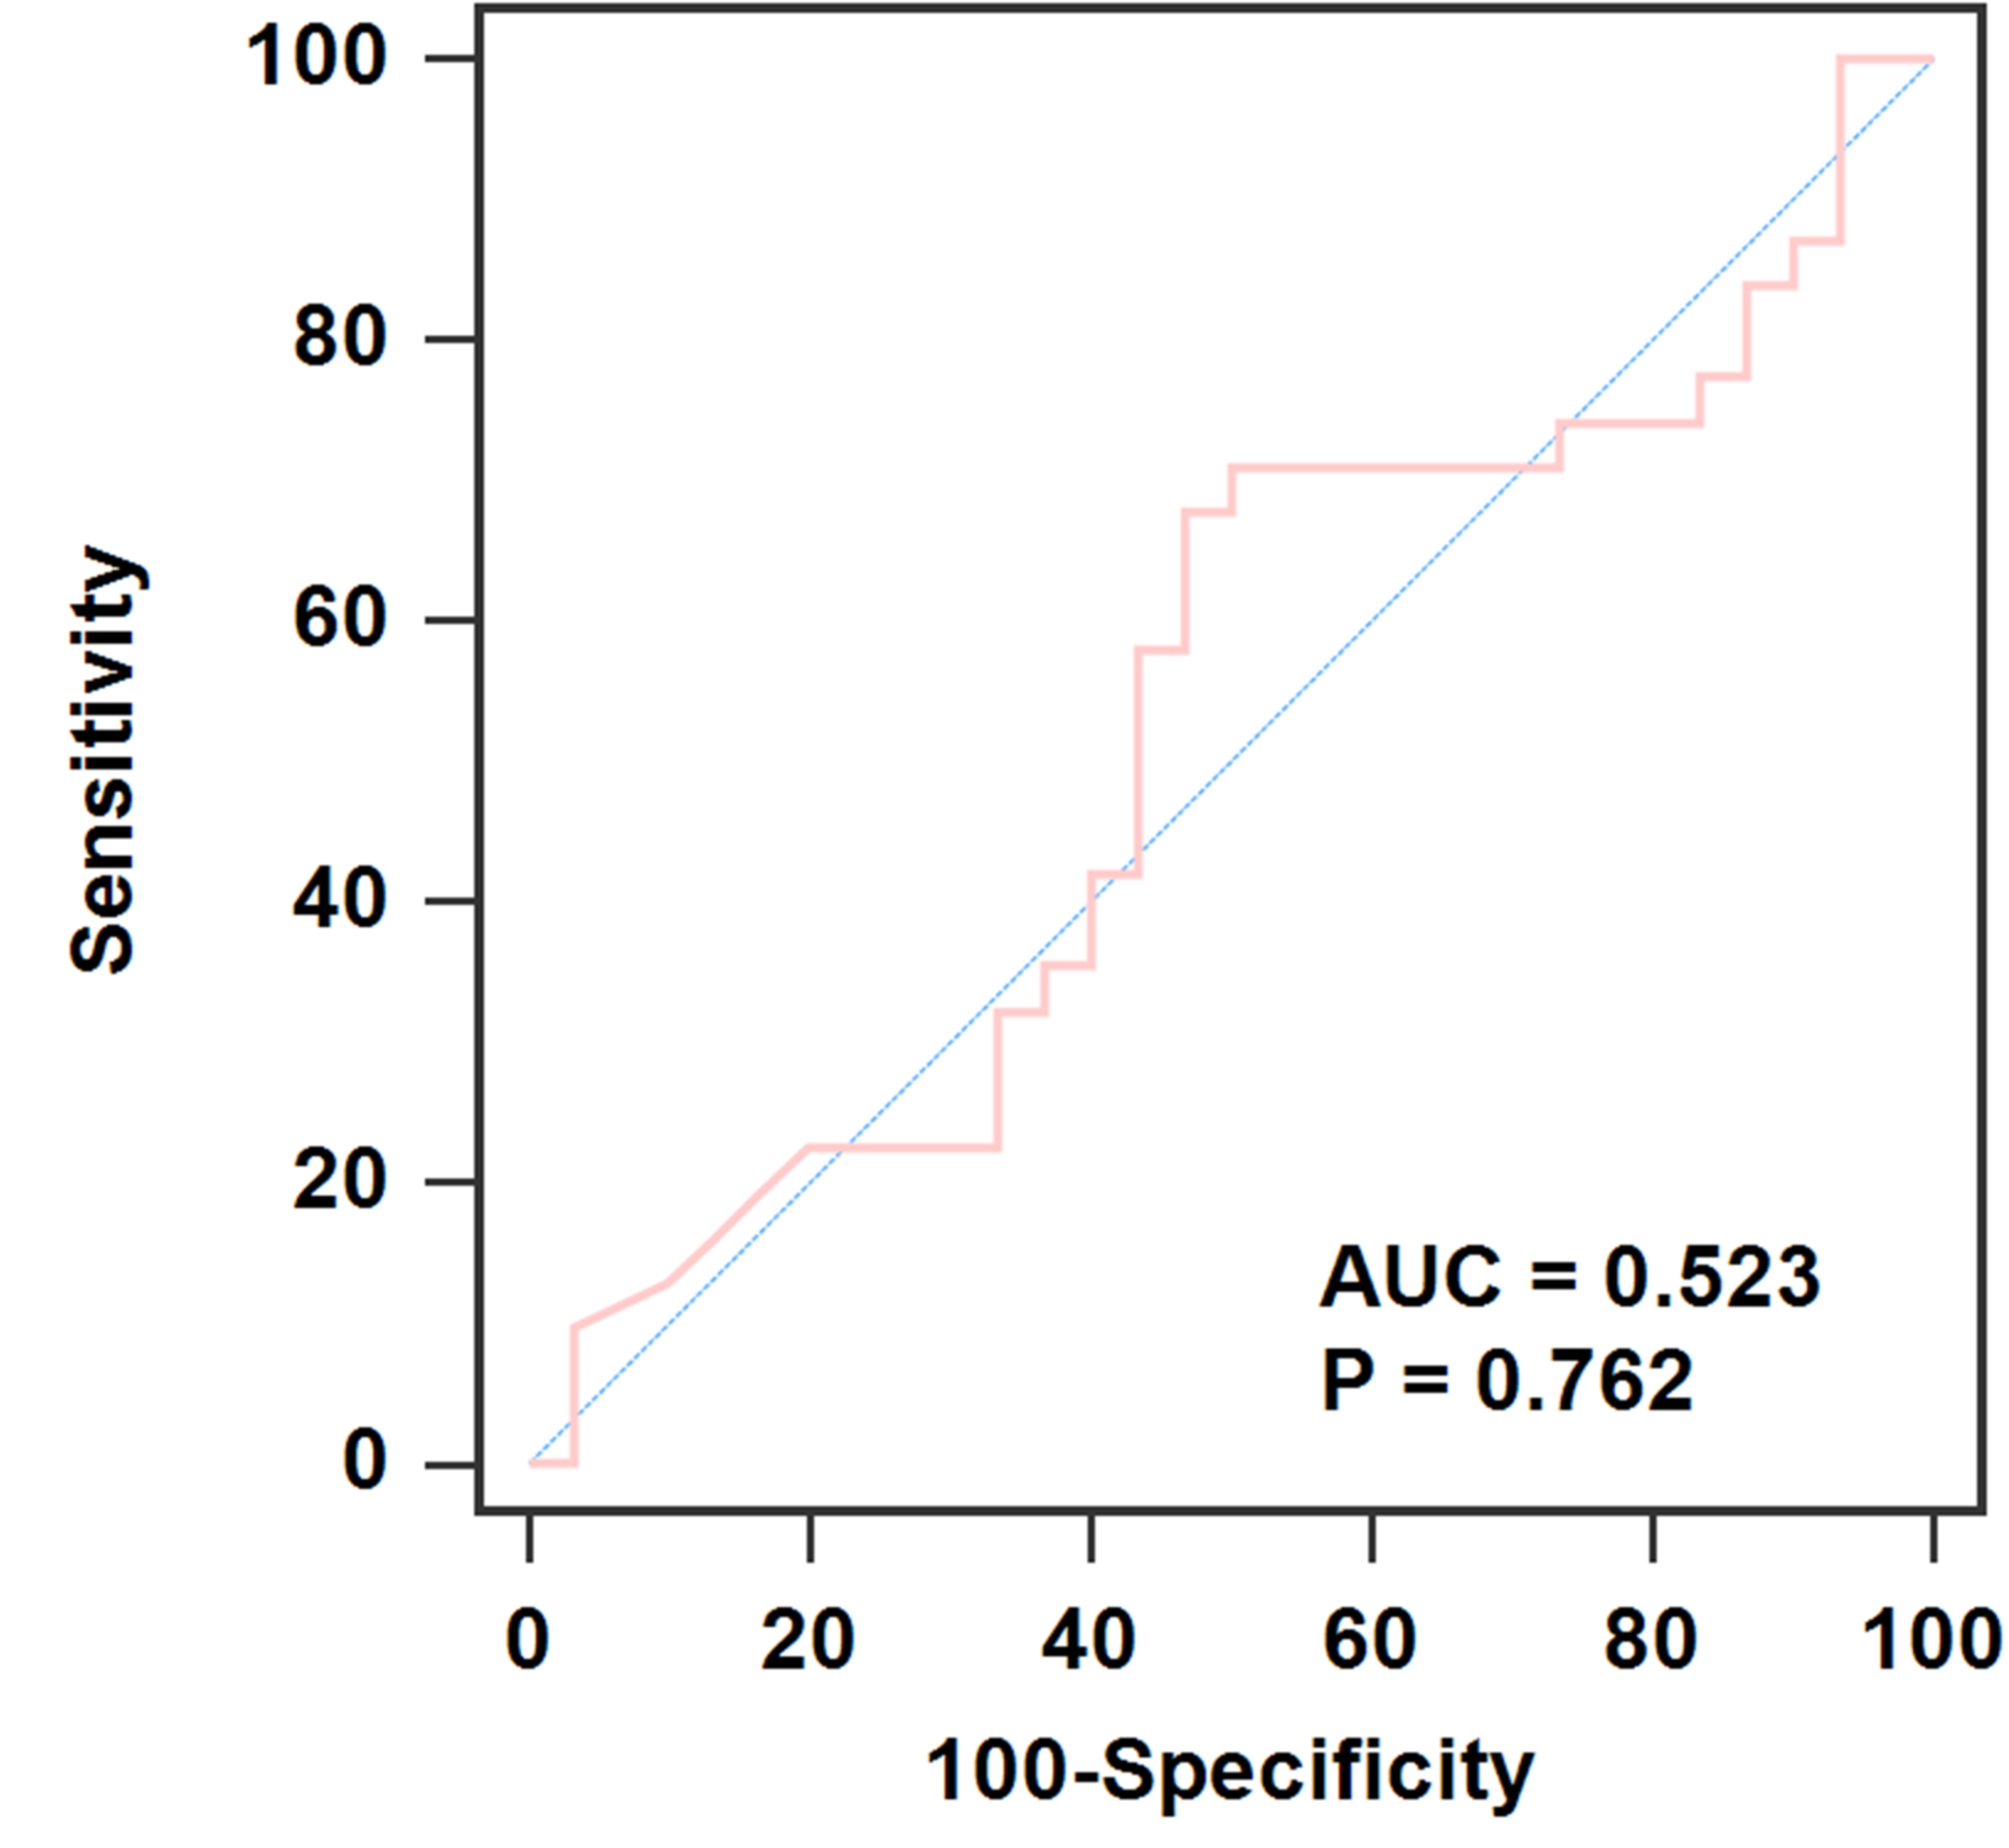

Supplement: Supplementary file 1 [file get_supplementary_file.php]
